# Supplementary material
Source: PubMed Central journal article supplement (PMC6124395)
Supplement: jciinsight-3-121086-s038.pdf [file jciinsight-3-121086-s038.pdf]

**Supplementary File:**

**Germline *SAMD9* and *SAMD9L* Mutations Are Associated with Extensive Genetic Evolution and Diverse Hematologic Outcomes**

Jasmine C. Wong<sup>1,4\*</sup>, Victoria Bryant<sup>2\*</sup>, Tamara Lamprecht<sup>2</sup>, Jing Ma<sup>2</sup>, Michael Walsh<sup>2</sup>, Jason Schwartz<sup>3</sup>, Maria del pilar Alzamora<sup>1,4</sup>, Charles G. Mullighan<sup>2</sup>, Mignon L. Loh<sup>1,4</sup>, Raul Ribeiro<sup>3</sup>, James R. Downing<sup>2</sup>, William L. Carroll<sup>5</sup>, Jeffrey Davis<sup>6</sup>, Stuart Gold<sup>7</sup>, Paul C. Rogers<sup>8</sup>, Sara Israels<sup>9</sup>, Rochelle Yanofsky<sup>9</sup>, Kevin Shannon<sup>1,4</sup> and Jeffery M. Klco<sup>2</sup>

# Supplemental Figure 1

**A**

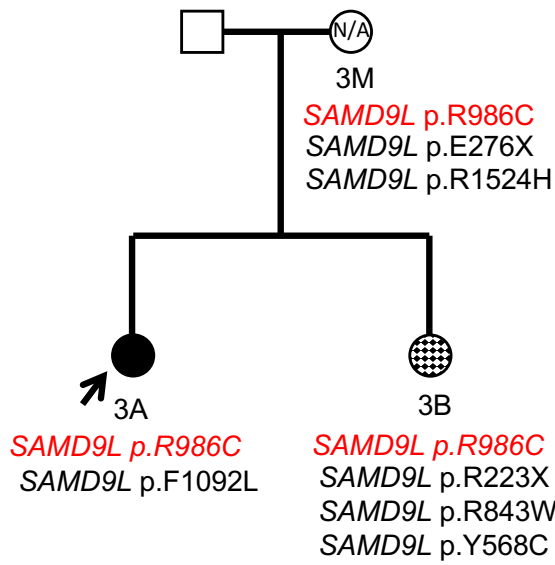

**B**

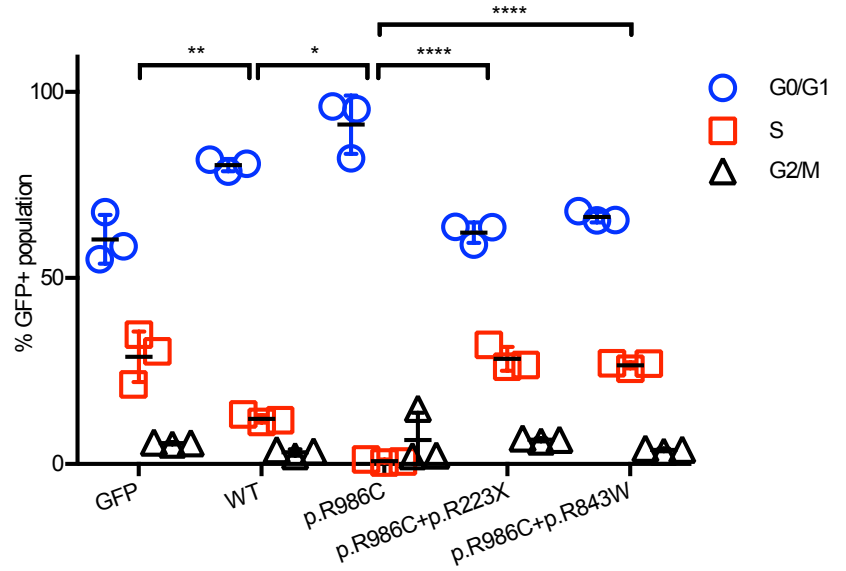

**C**

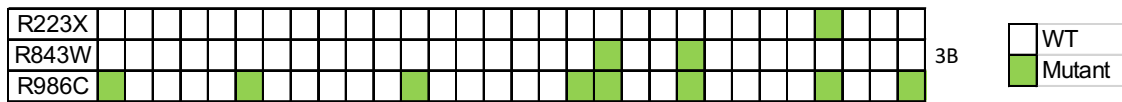

**D**

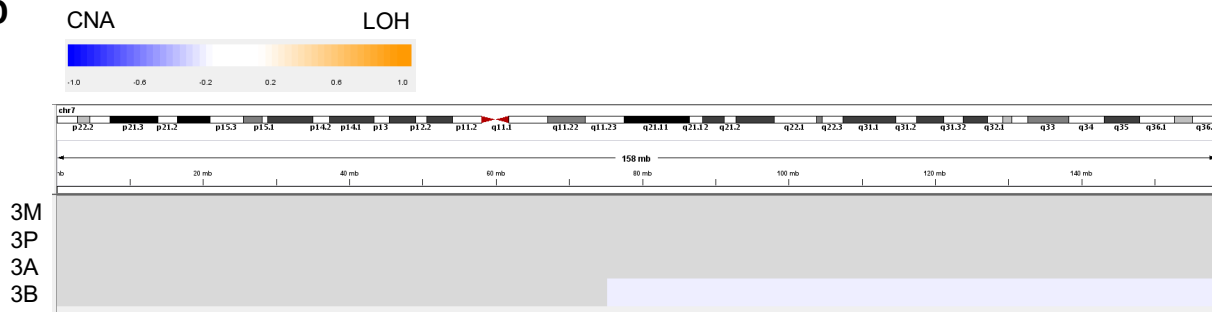

**E**

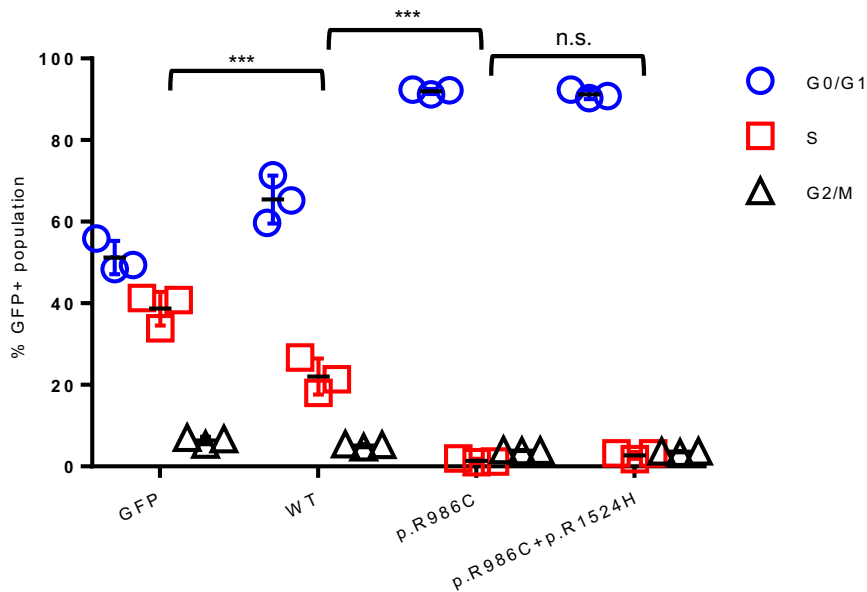

**Supplemental Figure 1. *SAMD9L* R986C Mutation in MLSM7 Family 3.** **A.** Pedigree of Family 3 with a germline *SAMD9L* p.R986C mutation. Pedigree symbol usage are the same as in Figure 2A. Symbol marked with a diamond fill pattern indicates interstitial deletion on chromosome 7q, while “N/A” indicates that clinical history is not available. Possible revertant mutations in *SAMD9L* are found in 3M, 3A and 3B. **B.** EdU cell cycle results showing empty GFP vector, *SAMD9L* WT, *SAMD9L* p.R986C, p.R986C *in cis* with p.R223X, and p.R986C *in cis* with p.R843W. Data representative of 3 experiments completed in triplicate. **C.** Sequencing results of individual PCR products from the amplified genomic DNA of patient 3B. Green box indicates mutation found, white box indicates WT sequence. Each column is an individual clone. **D.** SNP array data of chromosome 7 showing extent of LOH in patient 3B. **E.** EdU cell cycle results showing empty GFP vector, *SAMD9L* WT, *SAMD9L* p.R986C, p.R986C *in cis* with p.R1524H. Data representative of 2 experiments completed in triplicate. For B and E, the percentages of cells in the S phase of the cell division cycle were compared using one-way ANOVAs with repeated measures followed by Tukey’s posthoc multiple comparisons test, significance was based on alpha = 0.05. A p<0.05 was considered significant. (\*:p<0.05, \*\*: p<0.01, \*\*\*\*: p<0.0001, N=3). Individual data points, and mean ± SD are shown.

# Supplemental Figure 2

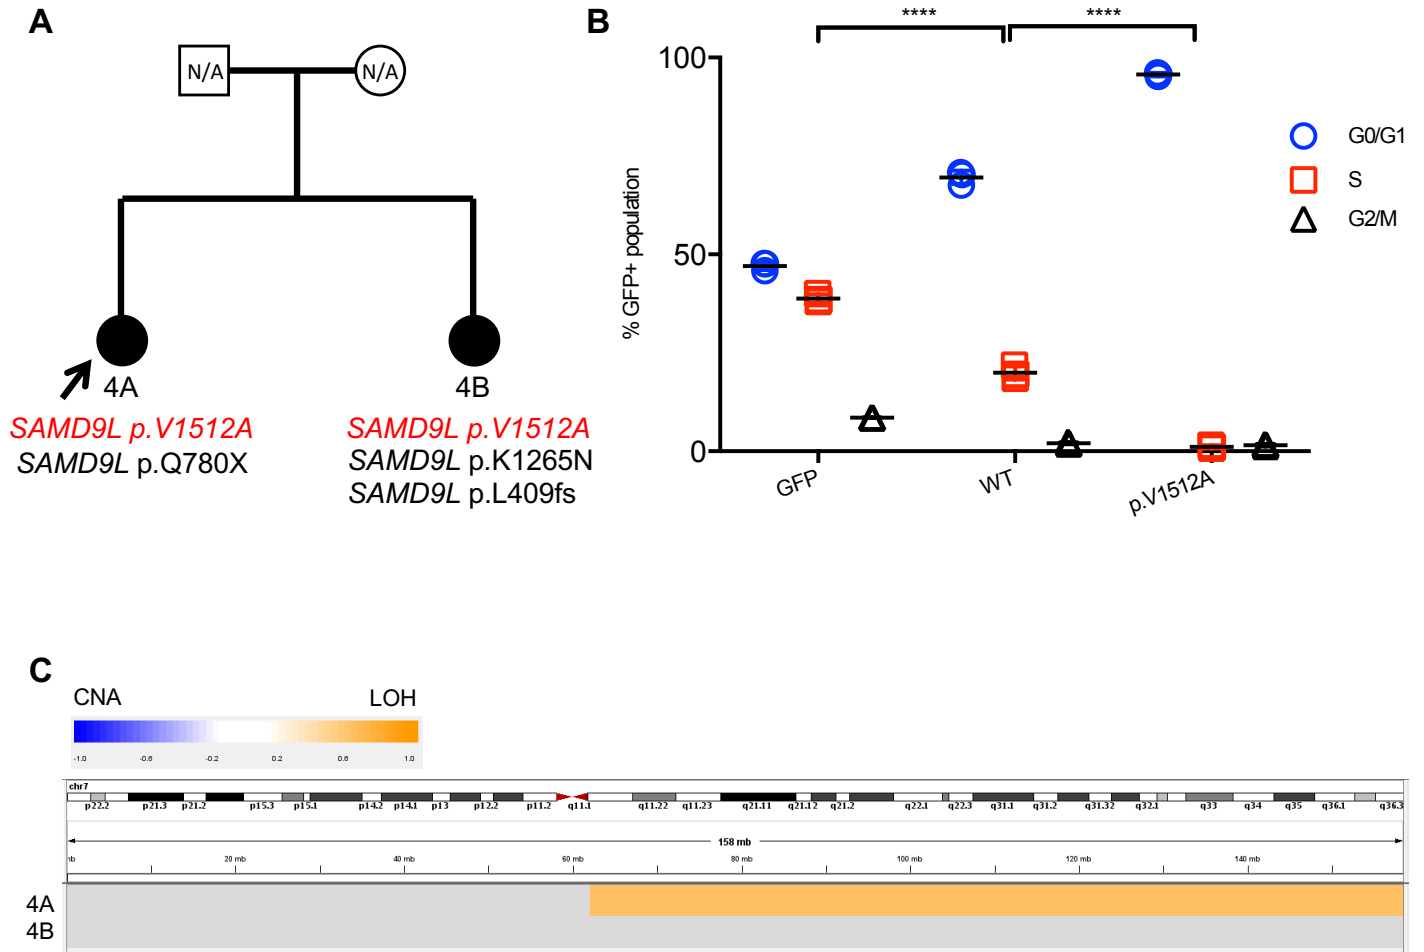

**Supplemental Figure 2. *SAMD9L* V1512A Mutation in MLSM7 Family 4.** **A.** Pedigree of Family 4 with a germline *SAMD9L* p.V1512A mutation. Pedigree symbol usage are the same as in Figure 2A. Symbol marked with “N/A” indicates that clinical history is not available. In addition, no DNA was available from the parents for analysis. Potential revertant mutations in *SAMD9L* are found in patients 4A and 4B. **B.** EdU cell cycle results showing empty GFP vector, *SAMD9L* WT and *SAMD9L* p.V1512A. Percentages of cells in the S phase of the cell division cycle were compared using one-way ANOVAs with repeated measures followed by Tukey’s posthoc multiple comparisons test, significance was based on  $\alpha = 0.05$ . A  $p < 0.05$  was considered significant. (\*\*\*\*:  $p < 0.0001$ ,  $N=3$ ). Individual data points, and mean  $\pm$  SD are shown. Data representative of 2 experiments completed in triplicate. **C.** SNP array data of chromosome 7 showing extent of LOH in patient 4A.

### Supplemental Figure 3

**A**

| Probe        | Enzyme  | Gene       | Location    | 1M       | 1A    | 1B    | 1P        |
|--------------|---------|------------|-------------|----------|-------|-------|-----------|
| NJ3          | Eco RI  | COL1A2     | 7q21.3      | 13.5/9.5 | 9.5/- | 9.5/- | 13.5/13.5 |
| PAI-1        | HindIII | SERPINE    | 7q22.1      | 18/22    | 22/-  | 22/-  | 18/18     |
| B79a (D7S13) | Msp I   | unknown    | 7q31.2      | 8.4/8.4  | 8.4/- | 8.4/- | 10.6/10.6 |
| J3.11 (D7S8) | Msp I   | Non-coding | 7q31.31     | 4.1/1.7  | 1.7/- | 4.1/- | 4.1/4.1   |
| C33          | Eco RI  | unknown    | 7q31.1-31.3 | 3.0/3.0  | 3.0/- | 3.5/- | 3.5/3.0   |

**B**

| Probe         | Enzyme  | Gene       | Location | 2M       | 2A     | 2B     | 2P      |
|---------------|---------|------------|----------|----------|--------|--------|---------|
| MDR-2 (ABCB4) | Eco RI  | ABCB4      | 7q21.12  | 4.5/3.1  | 3.1/-  | 4.5/-  | 4.5/3.1 |
| NJ3           | Eco RI  | COL1A2     | 7q21.3   | 9.5/13.5 | 13.5/- | 9.5/-  | 9.5/9.5 |
| PAI-1         | HindIII | SERPINE    | 7q22.1   | 18/22    | 22/-   | 18/-   | 22/22   |
| B79a (D7S13)  | Msp I   | unknown    | 7q31.2   | 11.6/8.4 | 8.4/-  | 11.6/- | 8.4/8.4 |
| Met D         | Taq I   | MET        | 7q31.2   | 4.3/5.5  | 5.5/-  | 4.3/-  | 5.5/4.3 |
| J3.11 (D7S8)  | Msp I   | Non-coding | 7q31.31  | 4.1/1.7  | 1.7/-  | 4.1/-  | 4.1/4.1 |

**Supplemental Figure 3 . RFLP Analysis of DNA Extracted from Parental**

**Leukocytes and Patient Monosomy 7 Cells in Families 1 and 2.** RFLP analysis for

families 1 and 2 are shown in panels A and B, respectively. Adapted from Shannon et al.

(1989). JCI (84): 984 – 989. Probes MDR-2 and NJ3 (denoted in red) detects RFLP in

the *ABCB4* and *COL1A2* genes located in chromosome 7q21.12 and 7q21.3

respectively, which are approximately 5.7Mb proximal and 1.3Mb distal from *SAMD9*

and *SAMD9L* on 7q21.2.

# Supplemental Figure 4

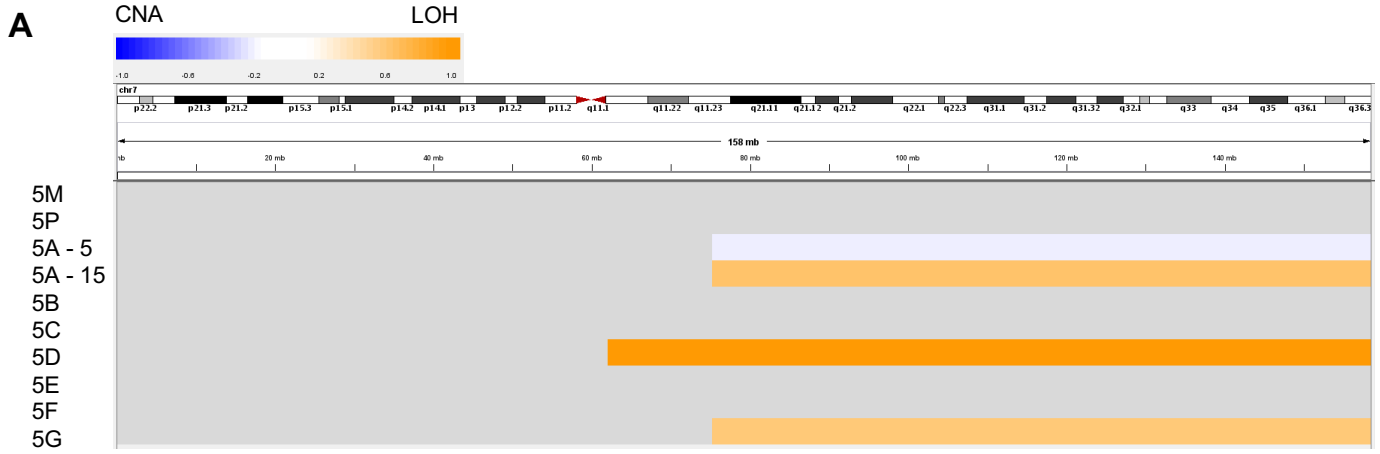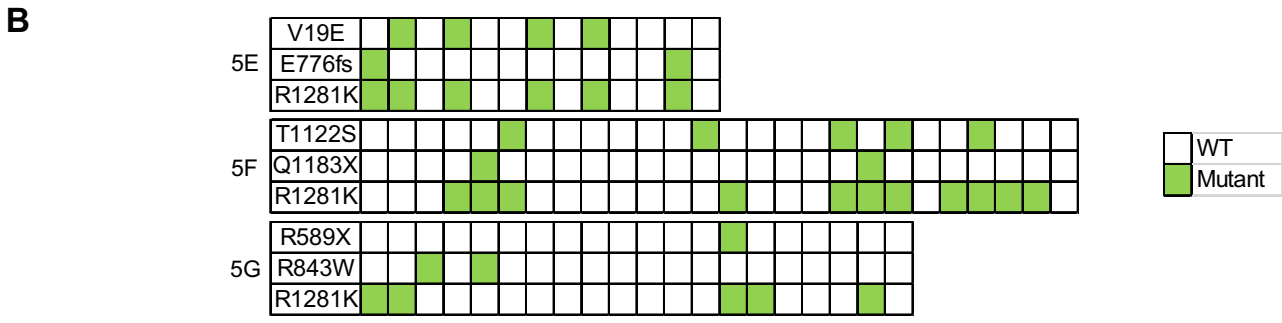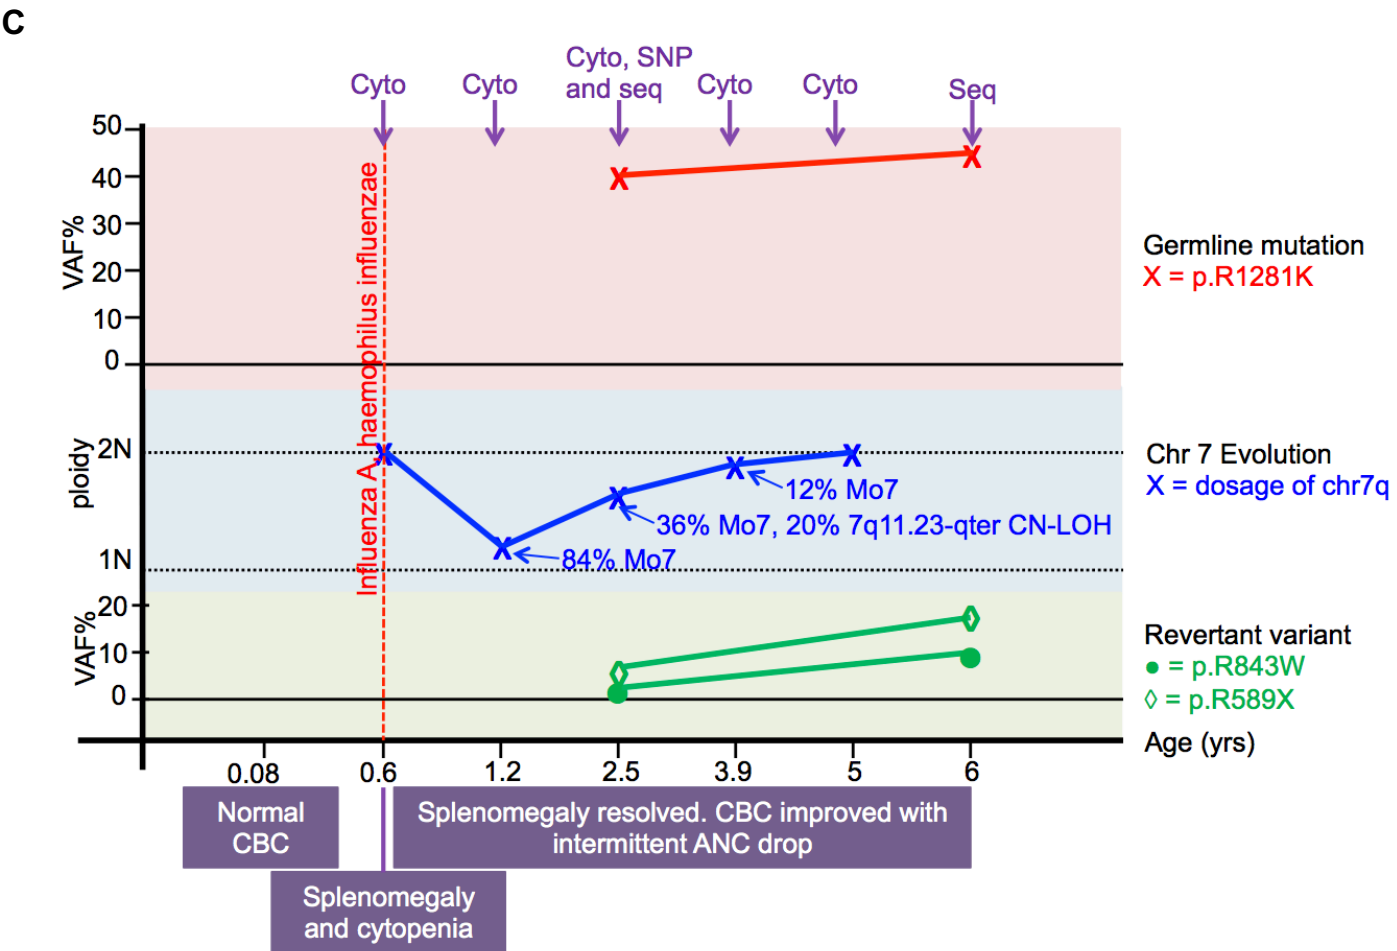



**Supplemental Figure 4. Clonal Evolution of Chromosome 7 and *SAMD9L* gene in**

**MLSM7 Family 5. A.** SNP array data of chromosome 7 showing domains of deletion or LOH in the blood or BM cells of patients 5A (at ages 5 and 15), 5D, and 5G. **B.**

Sequencing results of individual PCR products from the amplified genomic DNA of patient 5E, 5F and 5G. The green boxes indicate individual missense mutations and the white boxes depicts the normal sequence. Each column is an individual clone. **C.** Clonal evolution of the R1281K mutation, chromosome 7 and potential *SAMD9L* revertants in patient 5G over clinical course. Purple arrows indicate the timepoints at which cytogenetics (Cyto), SNP array (SNP) or *SAMD9L* sequencing (Seq) were performed.

ANC: Absolute Neutrophil Count.

Supplemental Figure 5

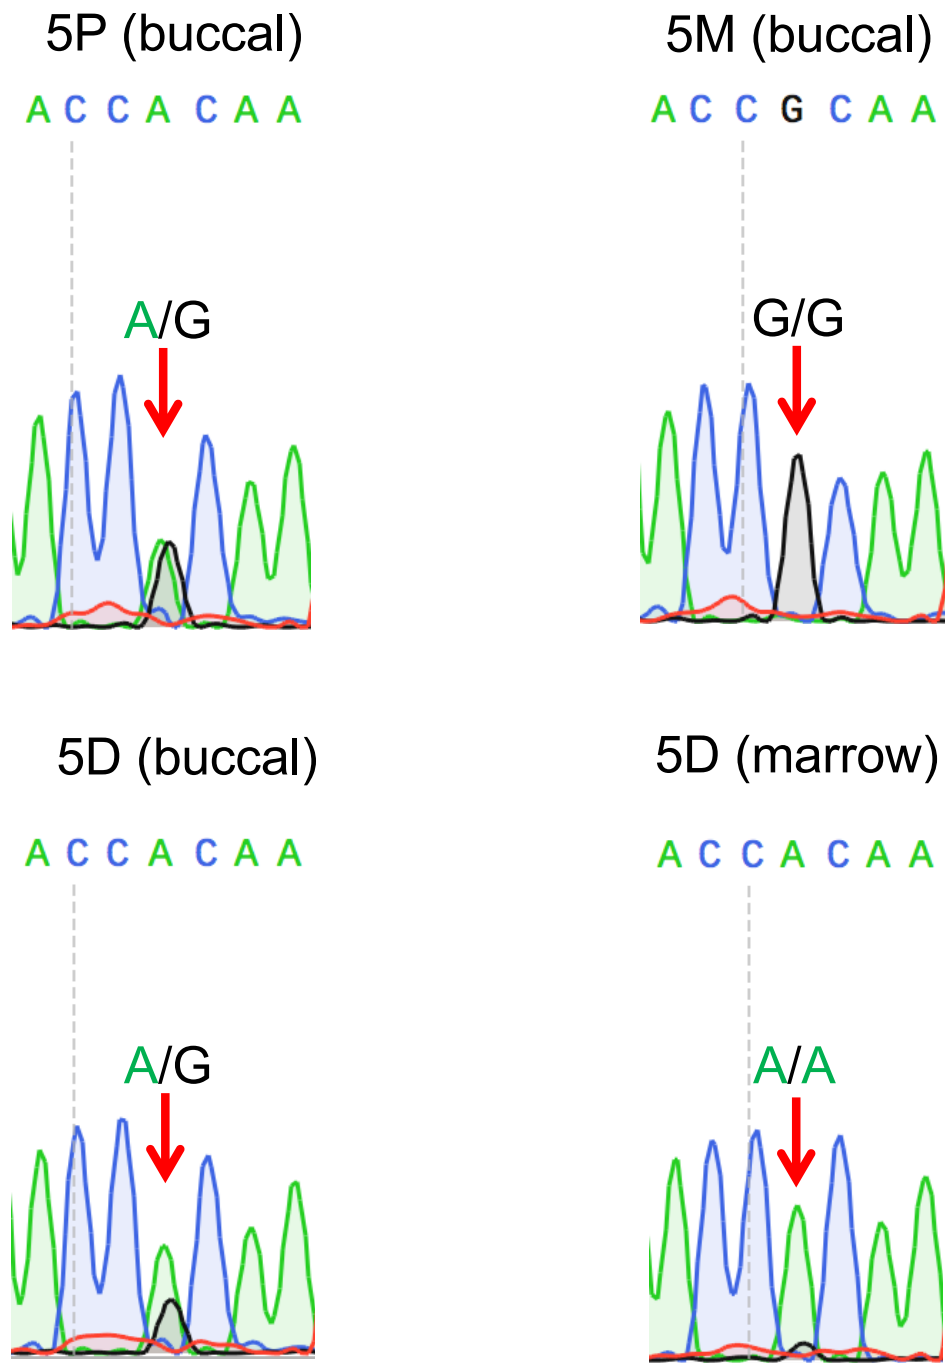

**Supplemental Figure 5. Validation of Acquired UPD in 5D. A.** Acquired UPD

detected by SNP array was validated by sequencing within the UPD region. PCR results demonstrate uniparental disomy for the father's normal chromosome 7 homolog in 7q11.21 in the bone marrow from 5D but not in her buccal DNA.

Supplemental Figure 6

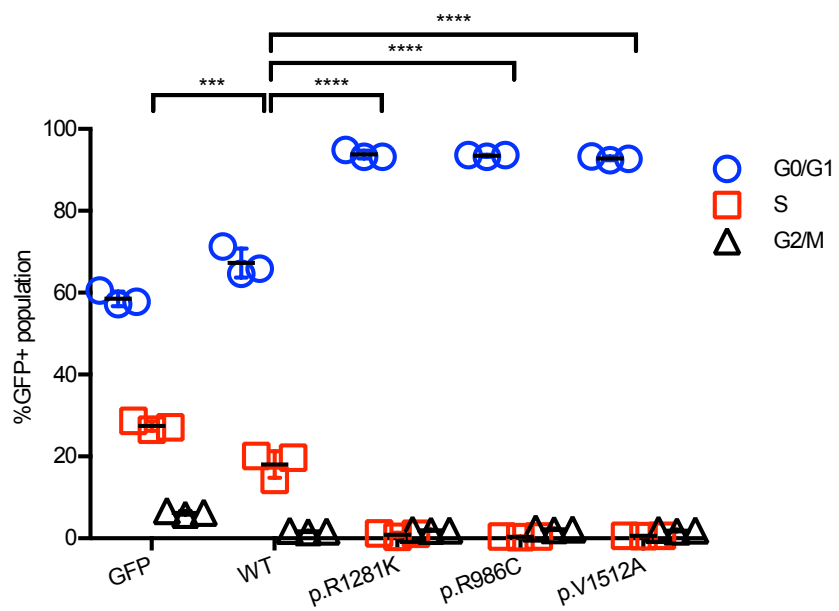

**Supplemental Figure 6. Functional comparison of three germline SAMD9L**

**mutations.** Despite the benign clinical course to date in the members of Family 5, the p.R1281K variant induced a similar cell cycle arrest phenotype in transduced 293T cells as the p.R986C and p.V1512A *SAMD9L* mutations. The percentages of cells in the S phase of the cell division cycle were compared using one-way ANOVAs with repeated measures followed by Tukey's posthoc multiple comparisons test, significance was based on alpha = 0.05. A  $p < 0.05$  was considered significant. (\*:  $p < 0.05$ , \*\*:  $p < 0.01$ , \*\*\*\*:  $p < 0.0001$ , N=3). There was no statistically significant difference between the S-phase fractions of cells expressing the different germline mutations. Individual data points, and mean  $\pm$  SD are shown.

Supplemental Figure 7

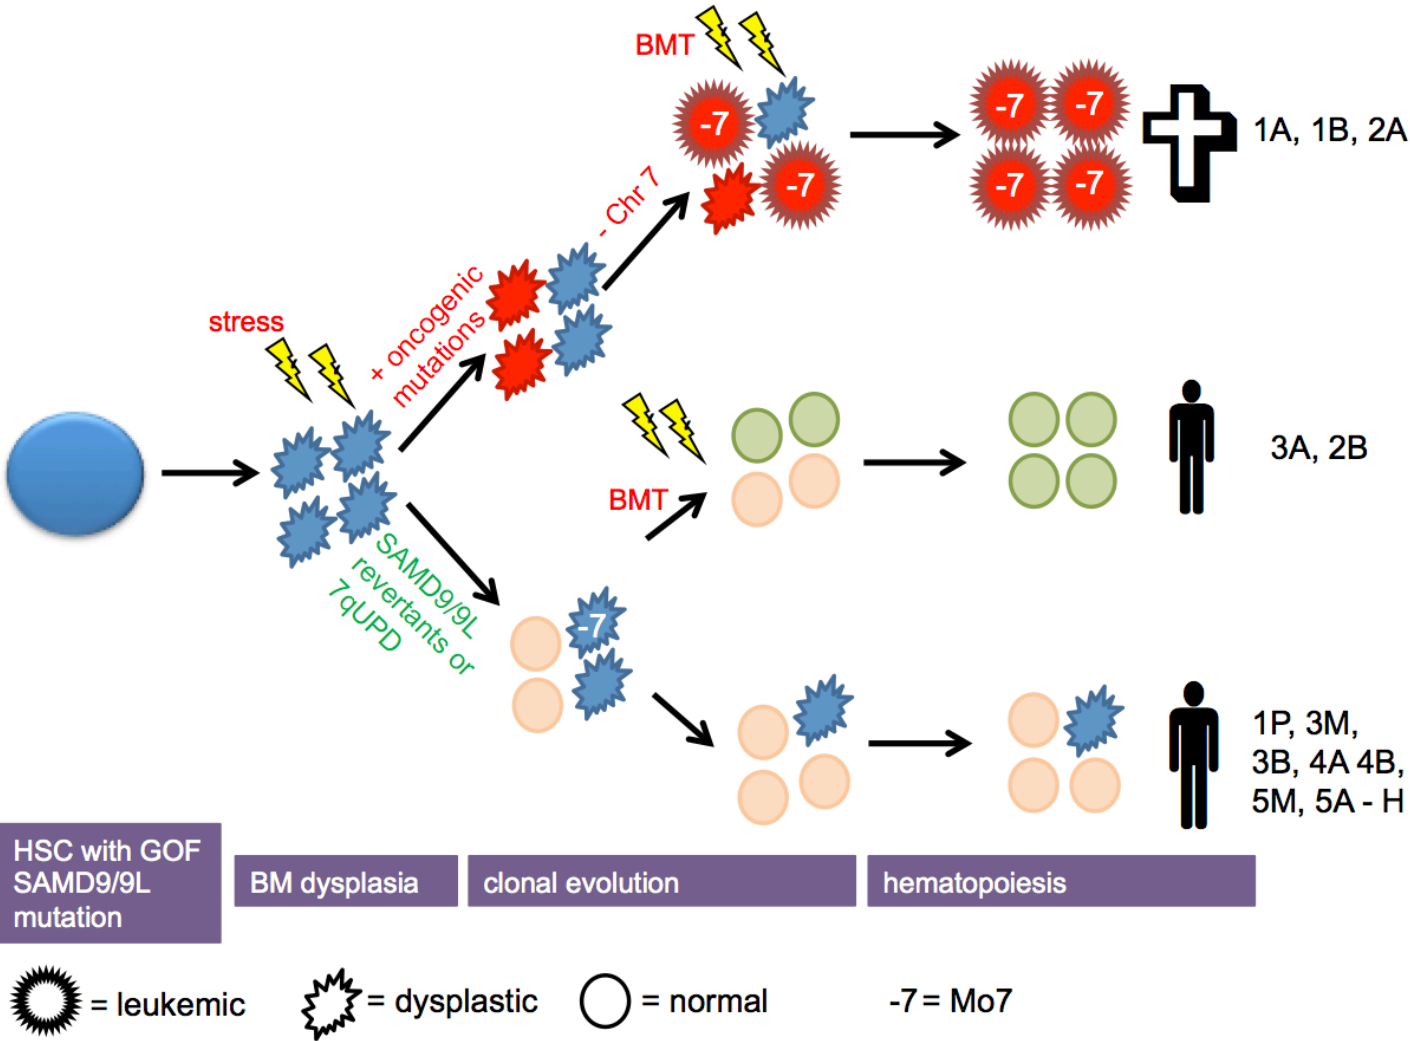

**Supplemental Figure 7. Illustration of clonal evolution and disease outcome of**

***SAMD9/9L* GOF mutation carriers.** This figure provides a synopsis of the possible outcomes of an HSC from a GOF *SAMD9/9L* mutation carrier. The initial stage is usually BM dysplasia, but the cells have the possibility to undergo different clonal evolution pathways, leading to very diverse outputs of hematopoietic cells (hematopoiesis). Cells are color-coded to indicate their mutation status. Blue: *SAMD9/9L* GOF mutation, red: oncogenic mutation, beige: *SAMD9/9L* revertant or 7qUPD, green: BMT donor cells with no mutations. Shapes of cells indicate their disease status. 32-point star indicates leukemic cells, explosion shape indicates dysplastic, and circles indicates normal. “-7” indicates cells with monosomy 7. Symbol of a human indicates healthy individuals, while symbol of a cross indicates deceased individuals.

Supplemental Figure 8

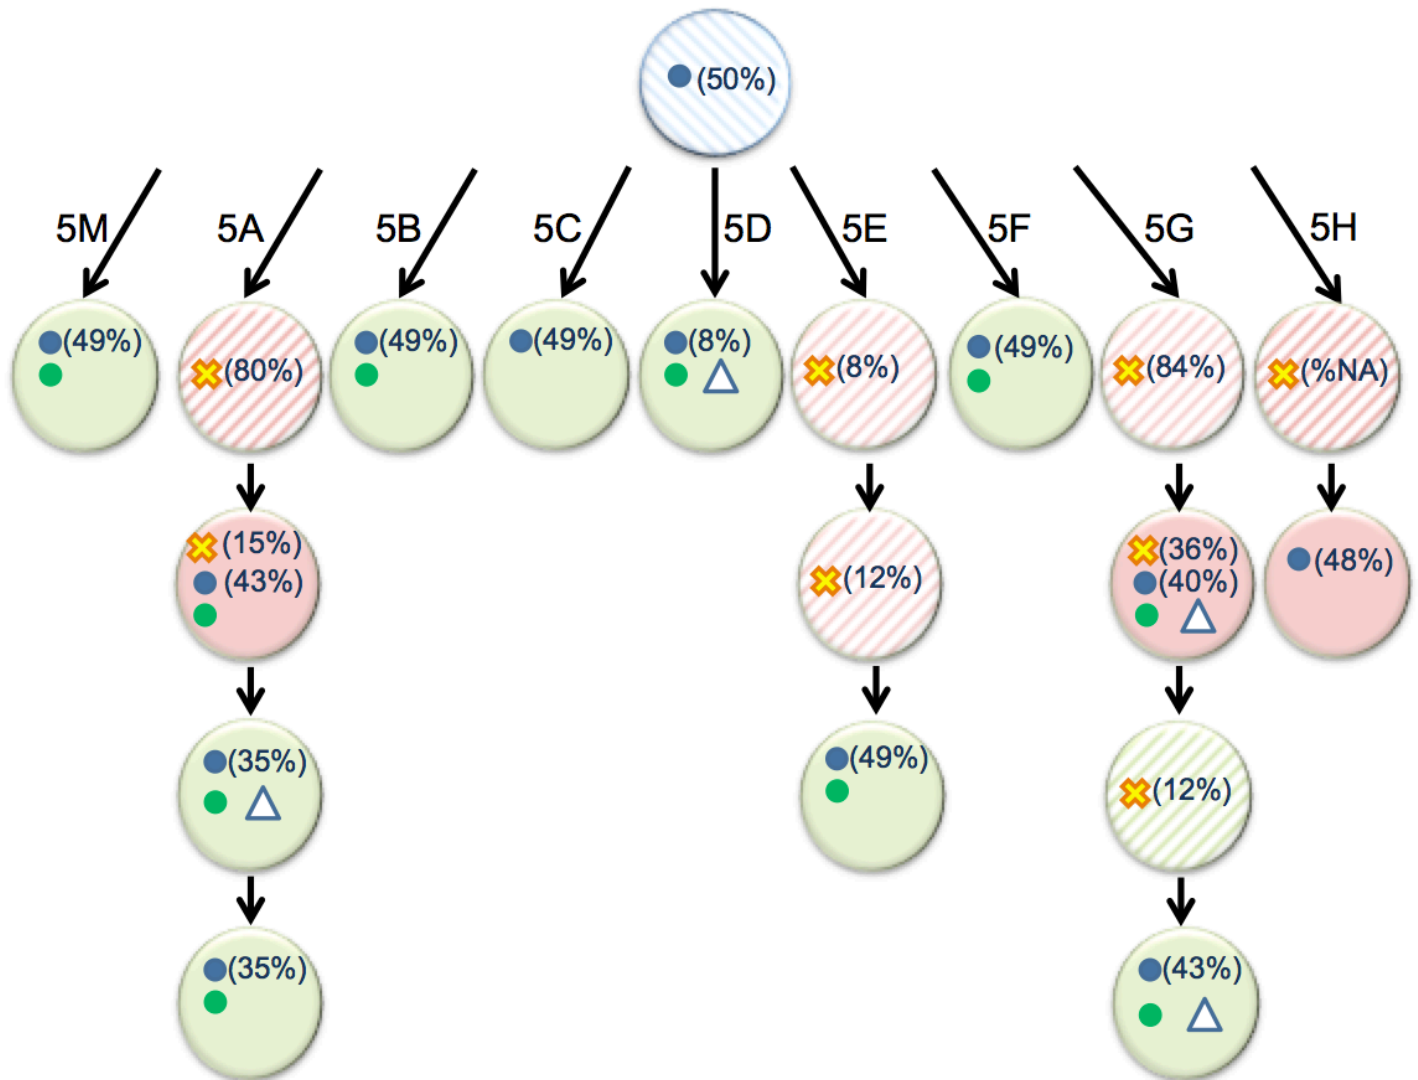

 = monosomy 7 or 7q deletion  
 = CN-LOH chr 7

 = germline *SAMD9/9L* mutation  
 = potential revertant *SAMD9/9L* allele(s)



**Supplemental Figure 8. Serial Genetic Changes on Chromosome 7 and Disease**

**Outcome of *SAMD9/9L* Mutation Carriers in Family 5.** Hematopoietic cells are color-coded in blue to indicate the germ line configuration (50% mutant allele frequency and normal cytogenetics), and the disease status of the different blood and bone marrow specimens analyzed. Large green circles depict specimens from individuals without hematologic abnormalities at the time of sample collection and large red circles from patients with hematologic abnormalities. Cells shaded with diagonal parallel lines indicate that only cytogenetic information is available for that sample. The colored symbols indicate specific genetic changes observed in each sample and are followed by numbers showing the variant allelic frequency (VAF) from sequencing data or the percentage of cells with monosomy 7 or a del(7q) detected by cytogenetic or SNP array analysis. Blue circles indicate the respective germline *SAMD9/9L* mutation; yellow crosses indicate the presence of monosomy 7 or a del(7q); green circles depict potential *SAMD9/9L* revertant alleles; and white triangles specify 7q copy neutral loss of heterozygosity (CN-LOH). VAFs were not included for the revertant mutations due to the fact the multiple potential revertants exist in many cases, some of which are in cis and some in trans. Copy number analyses by SNP array are presented in Supplemental Table 3, while VAFs for different potential revertant alleles are presented in Supplemental Table 4. For patients in whom multiple samples were analyzed over time, the samples collected at the youngest age are at the top and subsequent samples are shown below them. Abbreviation used include NA (not available).

Supplemental Figure 9

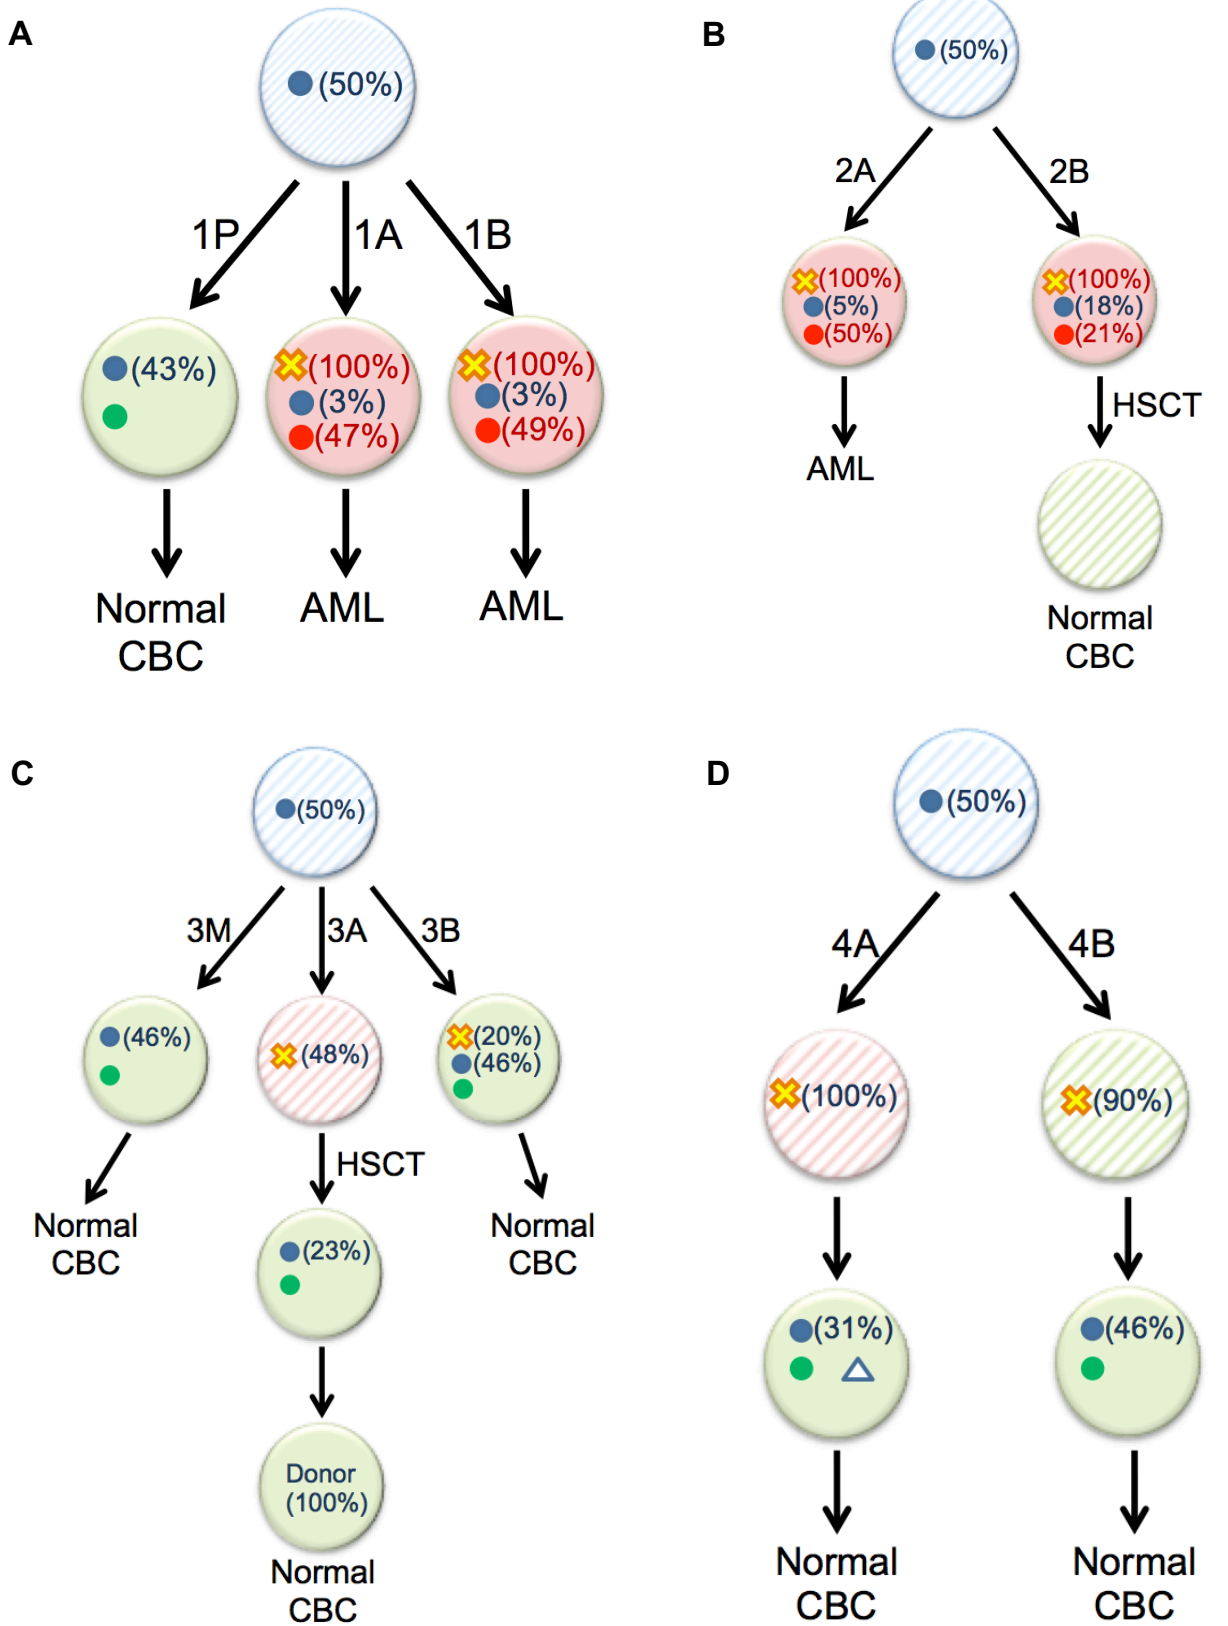

✘ = monosomy 7 or 7q deletion  
 △ = CN-LOH chr 7

● = germline *SAMD9/9L* mutation  
 ● = oncogenic mutation  
 ● = potential revertant *SAMD9/9L* allele(s)

## **Supplemental Figure 9. Serial Genetic Changes on Chromosome 7 and Disease**

**Outcome of *SAMD9/9L* Mutation Carriers.** Families 1-4 are shown in panels A-D,

respectively. Hematopoietic cells are color-coded in blue to indicate the germ line configuration in each family (50% mutant allele frequency and normal cytogenetics), and the disease status of the different blood and bone marrow specimens analyzed.

Large green circles depict specimens from individuals without hematologic abnormalities and large red circles from patients with hematologic abnormalities. Cells

shown in solid colors were investigated using a combination of cytogenetic, DNA sequencing, and SNP array analyses, while those shaded with a diagonal parallel line indicate that only cytogenetic information from the medical record was available. The

colored symbols indicate specific genetic changes observed in each sample and are

followed by numbers showing the variant allele frequency (VAF) from sequencing data or the percentage of cells with monosomy 7 or a del(7q) detected by cytogenetic or SNP

array analysis. Blue circles indicate the respective germline *SAMD9/9L* mutation; red

circles show the somatic mutations in known oncogenes (highest VAF is listed); yellow

crosses indicate the presence of monosomy 7 or a del(7q); green circles depict potential

*SAMD9/9L* revertant alleles; and white triangles specify 7q copy neutral loss of

heterozygosity (CN-LOH). VAFs were not included for the revertant mutations due to

the fact the multiple potential revertants exist in many cases, some of which are in cis

and some in trans. Copy number analyses by SNP array are presented in Supplemental

Table 3, while VAFs for different potential revertant alleles are presented in

Supplemental Table 4. Abbreviations used include HSCT (hematopoietic stem cell

transplant), CBC (complete blood count), MDS (myelodysplastic syndrome), and AML

(acute myeloid leukemia). Note that the middle sample for patient 3A was obtained ~1 year after a matched unrelated donor transplant, and the lower VAF likely reflects incomplete reconstitution with normal cells at that time point. This patient now reportedly has full donor chimerism (bottom circle).

### Supplemental Table 1

Clinical and Molecular Characteristics of *SAMD9* or *SAMD9L* Mutation Carriers

| Family         | Germline mutations     | Individuals and Germline VAFs | Potential revertant mutations           | Additional mutations                                                                           | Age at Diagnosis (years) | Current Age (years) | Initial Findings and Diagnosis                                           | Subsequent Course and Notes                                               |
|----------------|------------------------|-------------------------------|-----------------------------------------|------------------------------------------------------------------------------------------------|--------------------------|---------------------|--------------------------------------------------------------------------|---------------------------------------------------------------------------|
| 1 <sup>A</sup> | <i>SAMD9L</i><br>H880Q | 1P (dad)<br>43.17%            | Q569P                                   | ND                                                                                             | NA                       | NA                  | No hematologic abnormalities or ataxia                                   | NA                                                                        |
|                |                        | 1A (proband)<br>3.26%         | Mo7                                     | <i>RUNX1</i> (D171N),<br><i>SETBP1</i> (G870S)<br><i>CBL</i><br>(E366_E8splice)                | 0.75                     | D                   | Petechiae, suspected ITP but developed anemia after prednisone treatment | Died with refractory AML                                                  |
|                |                        | 1B (sibling)<br>3.22%         | Mo7                                     | <i>RUNX1</i> (N139fs),<br><i>SETBP1</i> (D868N),<br><i>BRAF</i> (N581Y),<br><i>KRAS</i> (T58I) | 5.5                      | D                   | Mo7 <sup>B</sup>                                                         | Developed AML and died from infection after BMT                           |
| 2 <sup>A</sup> | <i>SAMD9</i><br>K676E  | 2A (proband)<br>5.22%         | Mo7                                     | del 12p13.2<br>( <i>ETV6</i> ), <i>SETBP1</i><br>(D876N)<br><i>ASXL1</i> (K686fs)              | 4                        | D                   | AML                                                                      | Prolonged aplasia followed induction. Died of sepsis.                     |
|                |                        | 2B (sibling)<br>18.46%        | Mo7                                     | <i>ETV6</i> (R369Q)                                                                            | 2.5                      | 33                  | Pancytopenia, Mo7 <sup>B</sup>                                           | Persistent MDS, transplanted at age 9, doing well with minimal GVHD       |
| 3              | <i>SAMD9L</i><br>R986C | 3M (mom)<br>45.57%            | E276X<br>R1524H                         | ND                                                                                             | NA                       | NA                  | NA                                                                       | NA                                                                        |
|                |                        | 3A (proband)<br>23.44%        | Mo7 (historical)<br>F1092L              | ND                                                                                             | 2.5                      | 27                  | MDS Mo7                                                                  | Received BMT and recovered with donor engraftment. Well at last followup. |
|                |                        | 3B (sibling)<br>45.51%        | del(7q11-32)<br>R223X<br>R843W<br>Y568C | ND                                                                                             | 5.6                      | D                   | del(7)(q11;q32) <sup>B</sup>                                             | No hematologic abnormalities, died at age 27 of unrelated cause           |

|   |                 |                        |                                                                                                |    |       |    |                                                                                                                                |                                                                                                        |
|---|-----------------|------------------------|------------------------------------------------------------------------------------------------|----|-------|----|--------------------------------------------------------------------------------------------------------------------------------|--------------------------------------------------------------------------------------------------------|
| 4 | SAM9L<br>V1512A | 4A (proband)<br>31.17% | Mo7<br>Q780X                                                                                   | ND | 3     | 21 | Cytopenia, MCV<br>>100, Mo7                                                                                                    | Recovered with<br>resolution of Mo7                                                                    |
|   |                 | 4B (sibling)<br>46.06% | Mo7 (historical)<br>K1265N<br>L409fs                                                           | ND | 1.5   | 19 | Transient Mo7 <sup>B</sup>                                                                                                     | Mo7 resolved                                                                                           |
| 5 | SAM9L<br>R1281K | 5M (mom)<br>48.75%     |                                                                                                | ND |       | NA | Never had<br>hematologic<br>abnormalities                                                                                      | No hematologic<br>abnormalities                                                                        |
|   |                 | 5A (proband)<br>43.11% | Mo7 (historical)<br>Del7q<br>7q CN-LOH<br>R70C<br>A280T<br>R359Q<br>T1053I<br>F1092V<br>D1171N | ND | 0.33  | 26 | CMV infection at 4<br>months, anemia,<br>cytopenia,<br>dyspoiesis but<br>normal<br>cytogenetics. Mo7<br>diagnosed at<br>1.5yrs | Blood counts gradually<br>improved and Mo7<br>resolved                                                 |
|   |                 | 5B (sibling)<br>48.97% | V361fs                                                                                         | ND | 13.25 | 24 | Hypocellular BM<br>and dysplastic<br>changes, normal<br>cytogenetics <sup>B</sup>                                              | Bilateral camptodactyly<br>but overall healthy                                                         |
|   |                 | 5C (sibling)<br>48.54% | ND                                                                                             | ND | 10.75 | 22 | Hypocellular BM<br>and dysplastic<br>changes, normal<br>cytogenetics <sup>B</sup>                                              | Healthy                                                                                                |
|   |                 | 5D (sibling)<br>7.87%  | 7q CN-LOH<br>1152_1153del<br>R986L                                                             | ND | 9.6   | 21 | Hypocellular BM<br>and dysplastic<br>changes, normal<br>cytogenetics <sup>B</sup>                                              | Healthy                                                                                                |
|   |                 | 5E (sibling)<br>49.24% | Mo7 (historical)<br>V19E<br>E562K<br>E776fs                                                    | ND | 2.9   | 18 | Mildly<br>neutropenic and<br>thrombocytopenic<br>at age 2.9,<br>recurrent chest<br>infections in first                         | Blood counts gradually<br>improved and Mo7<br>resolved; sensory and<br>motor peripheral<br>neuropathy. |

|  |  |                        |                                                 |    |     |    |                                                                                           |                                            |
|--|--|------------------------|-------------------------------------------------|----|-----|----|-------------------------------------------------------------------------------------------|--------------------------------------------|
|  |  |                        |                                                 |    |     |    | few years of life and Mo7 at age 3                                                        |                                            |
|  |  | 5F (sibling)<br>49.42% | Q1183X<br>T1122S<br>1122_1124 del<br>S1397P     | ND | 6   | 17 | Hypocellular BM and dysplastic changes, normal cytogenetics <sup>B</sup>                  | Healthy                                    |
|  |  | 5G (sibling)<br>40.21% | Mo7 (historical)<br>7q CN-LOH<br>R843W<br>R589X | ND | 0.6 | 14 | Pancytopenia and recurrent chest infections in first few years of life and Mo7 at age 1.2 | Normal cytogenetics but hypocellular BM    |
|  |  | 5H (sibling)<br>48.25% | Mo7(historical)                                 | ND | 3.5 | 8  | Pancytopenia and easy bruising, hypocellular BM and Mo7                                   | Overall healthy with mild thrombocytopenia |

<sup>A</sup> - These families were initially reported in Refs 1 and 2.

<sup>B</sup> - Patients in this group were undergoing evaluation as potential transplant donors because they had one or more affected siblings, and did not have overt MDS or AML. ITP = idiopathic thrombocytopenic purpura, NA= not applicable or not available

D - deceased

ND – none detected

Supplemental Table 2 - Germline SAMD9/D9L mutations

## Representative samples

| Family | Individual | Relationship | Gender | Chr | Start    | End      | Ref | Alt | AACChange.refGene                        | snp138 | exp500s_all | exac03 | cosmic68                                    | SIFT_pred | Polyphen2_HDIV_pred | Polyphen2_HVAR_pred | Reads1_ref | Reads2_var | VAF    | Tissue Source |
|--------|------------|--------------|--------|-----|----------|----------|-----|-----|------------------------------------------|--------|-------------|--------|---------------------------------------------|-----------|---------------------|---------------------|------------|------------|--------|---------------|
| H880Q  | 1P         | parent       | male   | 7   | 92762645 | 92762645 | G   | T   | SAMD9L:NM_152703:exon5:c.C2640A:p.H880Q  | NA     | NA          | NA     | NA                                          | D         | D                   | P                   | 5498       | 4181       | 43.17% | PB            |
| H880Q  | 1M         | parent       | female | 7   | 92762645 | 92762645 | G   | T   | SAMD9L:NM_152703:exon5:c.C2640A:p.H880Q  | NA     | NA          | NA     | NA                                          | D         | D                   | P                   | 5890       | 5          | 0.08%  | PB            |
| H880Q  | 1A         | proband      | female | 7   | 92762645 | 92762645 | G   | T   | SAMD9L:NM_152703:exon5:c.C2640A:p.H880Q  | NA     | NA          | NA     | NA                                          | D         | D                   | P                   | 8645       | 291        | 3.26%  | BM            |
| H880Q  | 1B         | sibling      | male   | 7   | 92762645 | 92762645 | G   | T   | SAMD9L:NM_152703:exon5:c.C2640A:p.H880Q  | NA     | NA          | NA     | NA                                          | D         | D                   | P                   | 9509       | 316        | 3.22%  | BM            |
| K676E  | 2P         | parent       | male   | 7   | 92733385 | 92733385 | T   | C   | SAMD9:NM_017654:exon3:c.A2026G:p.K676E   | NA     | NA          | NA     | NA                                          | D         | P                   | B                   | 5973       | 10         | 0.17%  | PB            |
| K676E  | 2M         | parent       | female | 7   | 92733385 | 92733385 | T   | C   | SAMD9:NM_017654:exon3:c.A2026G:p.K676E   | NA     | NA          | NA     | NA                                          | D         | P                   | B                   | 25481      | 50         | 0.20%  | PB            |
| K676E  | 2A         | proband      | male   | 7   | 92733385 | 92733385 | T   | C   | SAMD9:NM_017654:exon3:c.A2026G:p.K676E   | NA     | NA          | NA     | NA                                          | D         | P                   | B                   | 19488      | 1073       | 5.22%  | BM            |
| K676E  | 2B         | sibling      | male   | 7   | 92733385 | 92733385 | T   | C   | SAMD9:NM_017654:exon3:c.A2026G:p.K676E   | NA     | NA          | NA     | NA                                          | D         | P                   | B                   | 15356      | 3476       | 18.46% | BM            |
| R986C  | 3P         | parent       | male   | 7   | 92762329 | 92762329 | G   | A   | SAMD9L:NM_152703:exon5:c.C2956T:p.R986C  | NA     | NA          | NA     | ID=COSM1224632;OCCURENCE=1(large_intestine) | D         | B                   | B                   | 8056       | 13         | 0.16%  | PB            |
| R986C  | 3M         | parent       | female | 7   | 92762329 | 92762329 | G   | A   | SAMD9L:NM_152703:exon5:c.C2956T:p.R986C  | NA     | NA          | NA     | ID=COSM1224632;OCCURENCE=1(large_intestine) | D         | B                   | B                   | 7988       | 6688       | 45.57% | PB            |
| R986C  | 3A         | proband      | female | 7   | 92762329 | 92762329 | G   | A   | SAMD9L:NM_152703:exon5:c.C2956T:p.R986C  | NA     | NA          | NA     | ID=COSM1224632;OCCURENCE=1(large_intestine) | D         | B                   | B                   | 3197       | 979        | 23.44% | BM            |
| R986C  | 3B         | sibling      | female | 7   | 92762329 | 92762329 | G   | A   | SAMD9L:NM_152703:exon5:c.C2956T:p.R986C  | NA     | NA          | NA     | ID=COSM1224632;OCCURENCE=1(large_intestine) | D         | B                   | B                   | 2677       | 2239       | 45.51% | BM            |
| V1512A | 4A         | proband      | female | 7   | 92760750 | 92760750 | A   | G   | SAMD9L:NM_152703:exon5:c.T4535C:p.V1512A | NA     | NA          | NA     | NA                                          | D         | B                   | B                   | 5611       | 2545       | 31.17% | BM            |
| V1512A | 4B         | sibling      | female | 7   | 92760750 | 92760750 | A   | G   | SAMD9L:NM_152703:exon5:c.T4535C:p.V1512A | NA     | NA          | NA     | NA                                          | D         | B                   | B                   | 6329       | 5410       | 46.06% | BM            |
| R1281K | 5P         | parent       | male   | 7   | 92761443 | 92761443 | C   | T   | SAMD9L:NM_152703:exon5:c.G3842A:p.R1281K | NA     | NA          | NA     | NA                                          | T         | B                   | B                   | 18258      | 17         | 0.09%  | PB            |
| R1281K | 5M         | parent       | female | 7   | 92761443 | 92761443 | C   | T   | SAMD9L:NM_152703:exon5:c.G3842A:p.R1281K | NA     | NA          | NA     | NA                                          | T         | B                   | B                   | 8139       | 7746       | 48.75% | PB            |
| R1281K | 5A-Age 5   | proband      | male   | 7   | 92761443 | 92761443 | C   | T   | SAMD9L:NM_152703:exon5:c.G3842A:p.R1281K | NA     | NA          | NA     | NA                                          | T         | B                   | B                   | 9173       | 6952       | 43.11% | BM            |
| R1281K | 5A-Age 15  | proband      | male   | 7   | 92761443 | 92761443 | C   | T   | SAMD9L:NM_152703:exon5:c.G3842A:p.R1281K | NA     | NA          | NA     | NA                                          | T         | B                   | B                   | 13969      | 7666       | 35.42% | PB            |
| R1281K | 5A-Age 18  | proband      | male   | 7   | 92761443 | 92761443 | C   | T   | SAMD9L:NM_152703:exon5:c.G3842A:p.R1281K | NA     | NA          | NA     | NA                                          | T         | B                   | B                   | 14252      | 7699       | 35.07% | PB            |
| R1281K | 5B         | sibling      | female | 7   | 92761443 | 92761443 | C   | T   | SAMD9L:NM_152703:exon5:c.G3842A:p.R1281K | NA     | NA          | NA     | NA                                          | T         | B                   | B                   | 7863       | 7549       | 48.97% | BM            |
| R1281K | 5C         | sibling      | male   | 7   | 92761443 | 92761443 | C   | T   | SAMD9L:NM_152703:exon5:c.G3842A:p.R1281K | NA     | NA          | NA     | NA                                          | T         | B                   | B                   | 9561       | 9023       | 48.54% | BM            |
| R1281K | 5D         | sibling      | female | 7   | 92761443 | 92761443 | C   | T   | SAMD9L:NM_152703:exon5:c.G3842A:p.R1281K | NA     | NA          | NA     | NA                                          | T         | B                   | B                   | 13326      | 1139       | 7.87%  | BM            |
| R1281K | 5E         | sibling      | female | 7   | 92761443 | 92761443 | C   | T   | SAMD9L:NM_152703:exon5:c.G3842A:p.R1281K | NA     | NA          | NA     | NA                                          | T         | B                   | B                   | 2748       | 2667       | 49.24% | BM            |
| R1281K | 5F         | sibling      | female | 7   | 92761443 | 92761443 | C   | T   | SAMD9L:NM_152703:exon5:c.G3842A:p.R1281K | NA     | NA          | NA     | NA                                          | T         | B                   | B                   | 3907       | 3820       | 49.42% | BM            |
| R1281K | 5G-Age 1.5 | sibling      | male   | 7   | 92761443 | 92761443 | C   | T   | SAMD9L:NM_152703:exon5:c.G3842A:p.R1281K | NA     | NA          | NA     | NA                                          | T         | B                   | B                   | 7310       | 4918       | 40.21% | BM            |
| R1281K | 5G-Age 6   | sibling      | male   | 7   | 92761443 | 92761443 | C   | T   | SAMD9L:NM_152703:exon5:c.G3842A:p.R1281K | NA     | NA          | NA     | NA                                          | T         | B                   | B                   | 6898       | 5311       | 43.47% | PB            |
| R1281K | 5H         | sibling      | female | 7   | 92761443 | 92761443 | C   | T   | SAMD9L:NM_152703:exon5:c.G3842A:p.R1281K | NA     | NA          | NA     | NA                                          | T         | B                   | B                   | 2320       | 2165       | 48.25% | BM            |



Supplemental Table 3 - Affy SNP6 array CNAs

| Family | Individual | Relationship | Gender | Sample      | chrom | loc.start | loc.end  | num.mark | seg.mean | seg.observedCN | CNAs                         | CytoBand             | NumGene |
|--------|------------|--------------|--------|-------------|-------|-----------|----------|----------|----------|----------------|------------------------------|----------------------|---------|
| H880Q  | 1P         | parent       | male   | 13f-4-snp6  | 6     | 26488021  | 29106021 | -        | -        | -              | CN-LOH                       | p22.2;p22.1          | 74      |
| H880Q  | 1P         | parent       | male   | 13f-4-snp6  | 12    | 1.1E+08   | 1.13E+08 | -        | -        | -              | CN-LOH                       | q24.11;q24.12;q24.13 | 49      |
| H880Q  | 1M         | parent       | female | 14f-7-snp6  | 5     | 1.29E+08  | 1.33E+08 | -        | -        | -              | CN-LOH                       | q23.3;q31.1          | 42      |
| H880Q  | 1A         | proband      | female | 19l-snp6    | 7     | 10238     | 1.59E+08 | 99416    | -1.0363  | -              | HetDel                       | p22.3--q36.3         | 1315    |
| H880Q  | 1A         | proband      | female | 19l-snp6    | 19    | 43282247  | 43542819 | 131      | -1.1391  | -              | HetDel                       | q13.2;q13.31         | 6       |
| H880Q  | 1B         | sibling      | male   | 20l-2-snp6  | 7     | 10238     | 1.59E+08 | 98224    | -1.0809  | 0.95           | HetDel                       | p22.3--q36.3         | 1315    |
| K676E  | 2P         | parent       | male   | 15f-2-snp6  | -     | -         | -        | -        | -        | -              | none                         | -                    | 0       |
| K676E  | 2M         | parent       | female | 16f-4-snp6  | -     | -         | -        | -        | -        | -              | none                         | -                    | 0       |
| K676E  | 2A         | proband      | male   | 17l-2-snp6  | 7     | 10238     | 1.59E+08 | 91641    | -0.986   | 1.01           | HetDel                       | p22.3--q36.3         | 1315    |
| K676E  | 2A         | proband      | male   | 17l-2-snp6  | 11    | 1.25E+08  | 1.25E+08 | 27       | -0.9658  | 1.02           | HetDel                       | q24.2                | 1       |
| K676E  | 2A         | proband      | male   | 17l-2-snp6  | 12    | 11703852  | 13937320 | 1941     | -0.9256  | 1.05           | HetDel                       | p13.2;p13.1          | 31      |
| K676E  | 2A         | proband      | male   | 17l-2-snp6  | 12    | 99251002  | 99276000 | 23       | -0.995   | 1              | HetDel                       | q23.1                | 2       |
| K676E  | 2B         | sibling      | male   | 18l-5-snp6  | 7     | 10238     | 1.59E+08 | 99735    | -0.7578  | 1.18           | HetDel                       | p22.3--q36.3         | 1315    |
| R986C  | 3P         | parent       | male   | 19f-3-snp6  | -     | -         | -        | -        | -        | -              | none                         | -                    | 0       |
| R986C  | 3M         | parent       | female | 18f-3-snp6  | 9     | 10743871  | 11869293 | 863      | -0.9648  | 1.02           | HetDel                       | p23                  | 0       |
| R986C  | 3M         | parent       | female | 18f-3-snp6  | 9     | 11869609  | 12113944 | 195      | -3.1392  | 0.23           | HomoDel                      | p23                  | 0       |
| R986C  | 3M         | parent       | female | 18f-3-snp6  | 9     | 12115536  | 12302928 | 168      | -1.0522  | 0.96           | HetDel                       | p23                  | 0       |
| R986C  | 3A         | proband      | female | 60l-1-snp6  | -     | -         | -        | -        | -        | -              | none                         | -                    | 0       |
| R986C  | 3B         | sibling      | female | 79l-3-snp6  | 7     | 75308064  | 1.59E+08 | -        | -        | -              | 7q HetDel(~20%ofthecells)    | q11.23--q36.3        | 742     |
| R986C  | 3B         | sibling      | female | 79l-3-snp6  | 9     | 10741186  | 12302928 | 1228     | -0.9351  | 1.05           | HetDel                       | p23                  | 0       |
| V1512A | 4A         | proband      | female | hm0263-snp6 | 7     | 62123565  | 1.59E+08 | -        | -        | -              | 7q CN-LOH(~35%ofthecells)    | q11.21--q36.3        | 866     |
| V1512A | 4A         | proband      | female | hm0263-snp6 | 9     | 11930000  | 12193000 | -        | -1.3     | 0.8            | HetDel                       | p23                  | 0       |
| V1512A | 4B         | sibling      | female | hm0264-snp6 | -     | -         | -        | -        | -        | -              | none                         | -                    | 0       |
| R1281K | 5P         | parent       | male   | 54j-1-snp6  | 18    | 25158002  | 27891002 | -        | -        | -              | CN-LOH                       | q12.1                | 2       |
| R1281K | 5M         | parent       | female | 106f-1-snp6 | 1     | 1.66E+08  | 1.95E+08 | -        | -        | -              | CN-LOH                       | q24.1--q31.3         | 228     |
| R1281K | 5M         | parent       | female | 106f-1-snp6 | 3     | 39852825  | 39953907 | 56       | -1.0282  | 0.98           | HetDel                       | p22.1                | 1       |
| R1281K | 5M         | parent       | female | 106f-1-snp6 | 7     | 5341474   | 9267475  | -        | -        | -              | CN-LOH                       | p22.1;p21.3          | 49      |
| R1281K | 5M         | parent       | female | 106f-1-snp6 | 13    | 77565999  | 1.04E+08 | -        | -        | -              | CN-LOH                       | q22.3--q33.1         | 143     |
| R1281K | 5M         | parent       | female | 106f-1-snp6 | 13    | 1.09E+08  | 1.13E+08 | -        | -        | -              | CN-LOH                       | q33.3;q34            | 38      |
| R1281K | 5M         | parent       | female | 106f-1-snp6 | 14    | 96660247  | 1.07E+08 | -        | -        | -              | CN-LOH                       | q32.2--q32.33        | 224     |
| R1281K | 5A-Age 5   | proband      | male   | 107f-1-snp6 | 3     | 39852825  | 39953907 | 56       | -0.9728  | 1.02           | HetDel                       | p22.1                | 1       |
| R1281K | 5A-Age 5   | proband      | male   | 107f-1-snp6 | 7     | 75308064  | 1.59E+08 | -        | -        | -              | 7q HetDel(~10-15%ofthecells) | q11.23--q36.3        | 742     |
| R1281K | 5A-Age 15  | proband      | male   | hm1239-snp6 | 3     | 39852825  | 39951888 | 55       | -1.0556  | 0.96           | HetDel                       | p22.1                | 1       |
| R1281K | 5A-Age 15  | proband      | male   | hm1239-snp6 | 7     | 75308064  | 1.59E+08 | -        | -        | -              | 7q CN-LOH(~30%ofthecells)    | q11.23--q36.3        | 742     |
| R1281K | 5B         | sibling      | female | hm1240-snp6 | -     | -         | -        | -        | -        | -              | none                         | -                    | 0       |
| R1281K | 5C         | sibling      | male   | hm1241-snp6 | -     | -         | -        | -        | -        | -              | none                         | -                    | 0       |
| R1281K | 5D         | sibling      | female | hm1242-snp6 | 7     | 62123565  | 1.59E+08 | -        | -        | -              | 7q CN-LOH                    | q11.21--q36.3        | 866     |
| R1281K | 5E         | sibling      | female | hm1243-snp6 | -     | -         | -        | -        | -        | -              | none                         | -                    | 0       |
| R1281K | 5F         | sibling      | female | hm1244-snp6 | 3     | 39852825  | 39951888 | 55       | -1.1222  | 0.92           | HetDel                       | p22.1                | 1       |
| R1281K | 5F         | sibling      | female | hm1244-snp6 | -     | -         | -        | -        | -        | -              | none                         | -                    | 0       |
| R1281K | 5G         | sibling      | male   | hm1245-snp6 | 7     | 75308064  | 1.59E+08 | -        | -        | -              | 7q CN-LOH(~20%ofthecells)    | q11.23--q36.3        | 742     |



Supplemental Table 5 - Haloplex Calls

|        | Individual | Relationship | Impacted Gene | AA            | Number of Variant Alleles | Filtered Read Depth, per sample | Allele Frequency | HGVSc Coding | Type      | Chrom | Pos       | Ref Allele | Alt Allele | Function Class | Codon         | Coding | Exon ID           |
|--------|------------|--------------|---------------|---------------|---------------------------|---------------------------------|------------------|--------------|-----------|-------|-----------|------------|------------|----------------|---------------|--------|-------------------|
| H880Q  | 1A         | proband      | <i>CBL</i>    | E366_E8splice | 78                        | 167                             | 46.70%           | NM_005188    | SNP       | 11    | 119148875 | G          | T          | Splice         |               | CODING |                   |
| H880Q  | 1A         | proband      | <i>RUNX1</i>  | D171N         | 145                       | 424                             | 34.20%           | NM_001001890 | SNP       | 21    | 36231792  | C          | T          | MISSENSE       | Gat/Aat       | CODING | NM_001001890.ex.3 |
| H880Q  | 1A         | proband      | <i>SETBP1</i> | G870S         | 183                       | 453                             | 40.40%           | NM_015559    | SNP       | 18    | 42531913  | G          | A          | MISSENSE       | Ggc/Agc       | CODING | NM_015559.ex.4    |
| H880Q  | 1B         | sibling      | <i>BRAF</i>   | N581Y         | 34                        | 135                             | 25.20%           | NM_004333    | SNP       | 7     | 140453987 | T          | A          | MISSENSE       | Aat/Tat       | CODING | NM_004333.ex.14   |
| H880Q  | 1B         | sibling      | <i>KRAS</i>   | T58I          | 207                       | 441                             | 46.90%           | NM_004985    | SNP       | 12    | 25380285  | G          | A          | MISSENSE       | aCa/aTa       | CODING | NM_004985.ex.3    |
| H880Q  | 1B         | sibling      | <i>RUNX1</i>  | N139fs        | 195                       | 395                             | 49.40%           | NM_001001890 | Insertion | 21    | 36252945  | G          | GT         | Frameshift     |               | CODING | NM_001001890.ex.2 |
| H880Q  | 1B         | sibling      | <i>SETBP1</i> | D868N         | 328                       | 750                             | 43.70%           | NM_015559    | SNP       | 18    | 42531907  | G          | A          | MISSENSE       | Gac/Aac       | CODING | NM_015559.ex.4    |
| K676E  | 2A         | proband      | <i>ASXL1</i>  | K686fs        | 370                       | 902                             | 41.00%           | NM_015338    | Deletion  | 20    | 31022572  | AGT        | A          | Frameshift     |               | CODING | NM_015338.ex.12   |
| K676E  | 2A         | proband      | <i>SETBP1</i> | D868N         | 479                       | 966                             | 49.60%           | NM_015559    | SNP       | 18    | 42531907  | G          | A          | MISSENSE       | Gac/Aac       | CODING | NM_015559.ex.4    |
| K676E  | 2B         | sibling      | <i>ETV6</i>   | R369Q         | 58                        | 275                             | 21.10%           | NM_001987    | SNP       | 12    | 12037475  | G          | A          | MISSENSE       | cGg/cAg       | CODING | NM_001987.ex.6    |
| K676E  | 2B         | sibling      | <i>SAMD9</i>  | K676E         | 16                        | 98                              | 16.30%           | NM_001193307 | SNP       | 7     | 92733385  | T          | C          | MISSENSE       | Aag/Gag       | CODING | NM_001193307.ex.2 |
| K676E  | 2M         | parent       | <i>CDKN2A</i> | D74A          | 21                        | 60                              | 35.00%           | NM_000077    | SNP       | 9     | 21971137  | T          | G          | MISSENSE       | gAc/gCc       | CODING | NM_000077.ex.2    |
| R986C  | 3A         | proband      | <i>SAMD9L</i> | R986C         | 49                        | 474                             | 10.30%           | NM_001303496 | SNP       | 7     | 92762329  | G          | A          | MISSENSE       | Cgt/Tgt       | CODING | NM_001303496.ex.5 |
| R986C  | 3B         | sibling      | <i>SAMD9L</i> | R986C         | 292                       | 793                             | 36.80%           | NM_001303496 | SNP       | 7     | 92762329  | G          | A          | MISSENSE       | Cgt/Tgt       | CODING | NM_001303496.ex.5 |
| R986C  | 3B         | sibling      | <i>SAMD9L</i> | R843W         | 31                        | 165                             | 18.80%           | NM_001303496 | SNP       | 7     | 92762758  | G          | A          | MISSENSE       | Cgg/Tgg       | CODING | NM_001303496.ex.5 |
| R986C  | 3B         | sibling      | <i>SAMD9L</i> | R223*         | 44                        | 390                             | 11.30%           | NM_001303496 | SNP       | 7     | 92764618  | G          | A          | NONSENSE       | Cga/Tga       | CODING | NM_001303496.ex.5 |
| V1512A | 4A         | proband      | <i>SAMD9L</i> | V1512A        | 126                       | 411                             | 30.70%           | NM_001303496 | SNP       | 7     | 92760750  | A          | G          | MISSENSE       | gTg/gCg       | CODING | NM_001303496.ex.5 |
| V1512A | 4B         | sibling      | <i>SAMD9L</i> | V1512A        | 208                       | 490                             | 42.40%           | NM_001303496 | SNP       | 7     | 92760750  | A          | G          | MISSENSE       | gTg/gCg       | CODING | NM_001303496.ex.5 |
| R1281K | 5A         | proband      | <i>SAMD9L</i> | R1281K        | 37                        | 70                              | 52.90%           | NM_001303496 | SNP       | 7     | 92761443  | C          | T          | MISSENSE       | aGg/aAg       | CODING | NM_001303496.ex.5 |
| R1281K | 5C         | sibling      | <i>SAMD9L</i> | R1281K        | 29                        | 63                              | 46.00%           | NM_001303496 | SNP       | 7     | 92761443  | C          | T          | MISSENSE       | aGg/aAg       | CODING | NM_001303496.ex.5 |
| R1281K | 5E         | sibling      | <i>SAMD9L</i> | R1281K        | 50                        | 99                              | 50.50%           | NM_001303496 | SNP       | 7     | 92761443  | C          | T          | MISSENSE       | aGg/aAg       | CODING | NM_001303496.ex.5 |
| R1281K | 5E         | sibling      | <i>SAMD9L</i> | V19E          | 34                        | 152                             | 22.40%           | NM_001303496 | SNP       | 7     | 92765229  | A          | T          | MISSENSE       | gTg/gAg       | CODING | NM_001303496.ex.5 |
| R1281K | 5F         | sibling      | <i>SAMD9L</i> | R1281K        | 43                        | 87                              | 49.40%           | NM_001303496 | SNP       | 7     | 92761443  | C          | T          | MISSENSE       | aGg/aAg       | CODING | NM_001303496.ex.5 |
| R1281K | 5F         | sibling      | <i>SAMD9L</i> | TLG1122S      | 86                        | 510                             | 16.90%           | NM_001303496 | Deletion  | 7     | 92761914  | CCTAGTG    | C          | Indel          | acactaggt/agt | CODING | NM_001303496.ex.5 |
| R1281K | 5H         | sibling      | <i>SAMD9L</i> | R1281K        | 34                        | 68                              | 50.00%           | NM_001303496 | SNP       | 7     | 92761443  | C          | T          | MISSENSE       | aGg/aAg       | CODING | NM_001303496.ex.5 |

Supplemental Table 6 - Haloplex Targets

| TargetID | Interval                  | Regions | Size  | Databases                            |
|----------|---------------------------|---------|-------|--------------------------------------|
| ASXL1    | chr20:30946569-31025151   | 17      | 5060  | CCDS, Ensembl, Gencode, RefSeq, VEGA |
| ASXL2    | chr2:25964888-26101101    | 13      | 4571  | Ensembl, Gencode, RefSeq, VEGA       |
| ATM      | chr11:108098342-108236245 | 62      | 10411 | CCDS, Ensembl, Gencode, RefSeq       |
| BCOR     | chrX:39909159-39937192    | 15      | 5648  | CCDS, Ensembl, Gencode, RefSeq, VEGA |
| BCORL1   | chrX:129139198-129190121  | 14      | 5690  | CCDS, Ensembl, Gencode, RefSeq, VEGA |
| BRAF     | chr7:140439612-140481493  | 7       | 813   | CustomRegion                         |
| CBL      | chr11:119148467-119149423 | 3       | 424   | CustomRegion                         |
| CDKN2A   | chr9:21968198-21994463    | 6       | 1248  | CCDS, Ensembl, Gencode, RefSeq, VEGA |
| CEBPA    | chr19:33792234-33793435   | 1       | 1202  | CCDS, Ensembl, Gencode, RefSeq, VEGA |
| CREBBP   | chr16:3777711-3799628     | 8       | 3233  | CustomRegion                         |
| CSF3R    | chr1:36932221-36933575    | 4       | 555   | CustomRegion                         |
| CTCF     | chr16:67644729-67662457   | 7       | 1734  | CustomRegion                         |
| CUX1     | chr7:101459301-101926392  | 34      | 6113  | CCDS, Ensembl, Gencode, RefSeq, VEGA |
| DDX41    | chr5:176939323-176942993  | 2       | 139   | CustomRegion                         |
| DHX15    | chr4:24572273-24572480    | 1       | 208   | CustomRegion                         |
| DNMT3A   | chr2:25457147-25468203    | 11      | 1304  | CustomRegion                         |
| ETV6     | chr12:12022356-12038963   | 3       | 815   | CustomRegion                         |
| EZH2     | chr7:148504728-148544400  | 21      | 2876  | CCDS, Ensembl, Gencode, RefSeq, VEGA |
| FLT3     | chr13:28588588-28610197   | 13      | 1619  | CustomRegion                         |
| GATA2    | chr3:128199860-128205219  | 4       | 1244  | CustomRegion                         |
| IDH1     | chr2:209113090-209113391  | 1       | 302   | CustomRegion                         |
| IDH2     | chr15:90631590-90631985   | 2       | 316   | CustomRegion                         |
| JAK1     | chr1:65303613-65312425    | 9       | 1276  | CustomRegion                         |
| JAK2     | chr9:5050684-5070055      | 7       | 1216  | CustomRegion                         |
| JAK3     | chr19:17943326-17949201   | 9       | 1282  | CustomRegion                         |
| KDM6A    | chrX:44732788-44970666    | 31      | 5090  | CCDS, Ensembl, Gencode, RefSeq, VEGA |
| KIT      | chr4:55589749-55599363    | 2       | 250   | CustomRegion                         |
| KRAS     | chr12:25380168-25398320   | 2       | 295   | CustomRegion                         |
| MGA      | chr15:41961083-42059488   | 24      | 9841  | CCDS, Ensembl, Gencode, RefSeq       |
| MPL      | chr1:43814930-43815039    | 1       | 110   | CustomRegion                         |
| MYC      | chr8:128750486-128753216  | 2       | 1391  | CustomRegion                         |
| NF1      | chr17:29422216-29705959   | 63      | 10271 | CCDS, Ensembl, Gencode, RefSeq, VEGA |
| NIPBL    | chr5:36953789-37065004    | 46      | 9380  | CCDS, Ensembl, Gencode, RefSeq, VEGA |
| NRAS     | chr1:115256420-115258785  | 2       | 300   | CustomRegion                         |
| PHF6     | chrX:133512032-133551336  | 7       | 978   | CustomRegion                         |
| PIK3C2A  | chr11:17111284-17136026   | 14      | 1919  | CustomRegion                         |
| PTEN     | chr10:89623697-89725239   | 9       | 1912  | CCDS, Ensembl, Gencode, RefSeq, VEGA |
| PTPN11   | chr12:112888120-112926983 | 2       | 360   | CustomRegion                         |
| RAD21    | chr8:117859729-117878978  | 13      | 2156  | CCDS, Ensembl, Gencode, RefSeq, VEGA |
| RIT1     | chr1:155874095-155874295  | 1       | 201   | CustomRegion                         |
| RRAS     | chr19:50140081-50140185   | 1       | 105   | CustomRegion                         |
| RUNX1    | chr21:36164422-36421206   | 11      | 1804  | CCDS, Ensembl, Gencode, RefSeq, VEGA |
| SAMD9    | chr7:92730631-92735420    | 1       | 4790  | CCDS, Ensembl, Gencode, RefSeq, VEGA |
| SAMD9L   | chr7:92760520-92765294    | 1       | 4775  | CCDS, Ensembl, Gencode, RefSeq, VEGA |
| SETBP1   | chr18:42449195-42533327   | 2       | 3542  | CustomRegion                         |
| SETD2    | chr3:47058573-47205424    | 23      | 8200  | CCDS, Ensembl, Gencode, RefSeq, VEGA |
| SF3B1    | chr2:198266708-198267559  | 2       | 431   | CustomRegion                         |
| SMC1A    | chrX:53407014-53449559    | 26      | 4402  | CCDS, Ensembl, Gencode, RefSeq, VEGA |
| SMC3     | chr10:112327565-112364070 | 29      | 4234  | CCDS, Ensembl, Gencode, RefSeq, VEGA |
| SOS1     | chr2:39249709-39251287    | 2       | 814   | CustomRegion                         |
| SRSF2    | chr17:74732865-74733253   | 1       | 389   | CustomRegion                         |
| STAG2    | chrX:123156468-123234457  | 34      | 4541  | CCDS, Ensembl, Gencode, RefSeq, VEGA |
| TET2     | chr4:106111617-106197686  | 10      | 6365  | CCDS, Ensembl, Gencode, RefSeq, VEGA |
| TP53     | chr17:7565247-7579922     | 14      | 1658  | CCDS, Ensembl, Gencode, RefSeq, VEGA |
| WT1      | chr11:32410594-32456901   | 11      | 1788  | CCDS, Ensembl, Gencode, RefSeq, VEGA |
| ZRSR2    | chrX:15808609-15841375    | 12      | 1930  | CCDS, Ensembl, Gencode, RefSeq, VEGA |

Supplemental Table 7 - Haloplex coverage

| Family | Individual | Relationship | HighQualityReads | MedianReadDepth |
|--------|------------|--------------|------------------|-----------------|
| H880Q  | 1M         | parent       | 460263           | 140             |
| H880Q  | 1A         | proband      | 533302           | 172             |
| H880Q  | 1B         | sibling      | 777695           | 246             |
| K676E  | 2P         | parent       | 624785           | 194             |
| K676E  | 2M         | parent       | 1202839          | 378             |
| K676E  | 2A         | proband      | 961997           | 294             |
| K676E  | 2B         | sibling      | 582880           | 185             |
| R986C  | 3A         | proband      | 896876           | 301             |
| R986C  | 3B         | sibling      | 897232           | 300             |
| V1512A | 4A         | proband      | 696854           | 235             |
| V1512A | 4B         | sibling      | 962792           | 295             |
| R1281K | 5A         | proband      | 888462           | 283             |
| R1281K | 5B         | sibling      | 483439           | 161             |
| R1281K | 5C         | sibling      | 753589           | 241             |
| R1281K | 5D         | sibling      | 463747           | 158             |
| R1281K | 5E         | sibling      | 1161641          | 398             |
| R1281K | 5F         | sibling      | 1152491          | 395             |
| R1281K | 5G         | sibling      | 255242           | 82              |
| R1281K | 5H         | sibling      | 854382           | 287             |

Supplemental Table 8 - Amplicon coverage

| Family | Individual | Relationship | Tot_reads | Primer set 1 |             |              |             |             |             | Primer set 2 |              |             |              |             |             |             |
|--------|------------|--------------|-----------|--------------|-------------|--------------|-------------|-------------|-------------|--------------|--------------|-------------|--------------|-------------|-------------|-------------|
|        |            |              |           | Mapped_reads | UnMpd_reads | Mapped_ratio | D9 Primer 1 | D9 Primer 3 | 9L Primer 2 | Tot_reads    | Mapped_reads | UnMpd_reads | Mapped_ratio | D9 Primer 2 | 9L Primer 1 | 9L Primer 3 |
| H880Q  | 1P         | parent       | 211300    | 211228       | 72          | 99.97%       | 7187        | 13353       | 8723        | 169153       | 169100       | 53          | 99.97%       | 10614       | 8275        | 3850        |
| H880Q  | 1M         | parent       | 361170    | 360990       | 327         | 99.95%       | 8689        | 18955       | 10819       | 373936       | 373732       | 484         | 99.95%       | 16161       | 12885       | 5528        |
| H880Q  | 1A         | proband      | 227757    | 227691       | 66          | 99.97%       | 7350        | 15714       | 7758        | 152578       | 152538       | 40          | 99.97%       | 9168        | 6977        | 3702        |
| H880Q  | 1A         | proband      | 140250    | 140208       | 42          | 99.97%       | 5055        | 8559        | 6017        | 393267       | 393126       | 141         | 99.96%       | 19283       | 16694       | 8635        |
| H880Q  | 1A         | proband      | 292855    | 292781       | 74          | 99.97%       | 9491        | 17705       | 11977       | 239706       | 239616       | 90          | 99.96%       | 13398       | 11394       | 5974        |
| H880Q  | 1A         | proband      | 295792    | 295669       | 123         | 99.96%       | 8891        | 19385       | 9696        | 277594       | 277480       | 114         | 99.96%       | 16395       | 12786       | 4644        |
| H880Q  | 1B         | sibling      | 273265    | 273171       | 94          | 99.97%       | 7721        | 19613       | 8971        | 201494       | 201404       | 90          | 99.96%       | 12237       | 9519        | 4325        |
| H880Q  | 1B         | sibling      | 165397    | 165332       | 65          | 99.96%       | 5766        | 10939       | 6340        | 266347       | 266254       | 93          | 99.97%       | 14273       | 11541       | 5750        |
| H880Q  | 1B         | sibling      | 366047    | 365950       | 97          | 99.97%       | 10040       | 24757       | 13226       | 349501       | 349367       | 134         | 99.96%       | 19059       | 15442       | 7126        |
| H880Q  | 1B         | sibling      | 280525    | 280426       | 99          | 99.96%       | 8393        | 18311       | 9180        | 381457       | 381289       | 168         | 99.96%       | 21060       | 16486       | 6191        |
| K676E  | 2P         | parent       | 279595    | 279507       | 88          | 99.97%       | 9152        | 14109       | 13195       | 125699       | 125656       | 43          | 99.97%       | 5153        | 6023        | 3189        |
| K676E  | 2M         | parent       | 332289    | 332135       | 154         | 99.95%       | 8012        | 20256       | 9793        | 374160       | 374009       | 151         | 99.96%       | 22192       | 17520       | 7444        |
| K676E  | 2A         | patient      | 235863    | 235793       | 70          | 99.97%       | 9018        | 15458       | 9047        | 4679         | 4674         | 5           | 99.89%       | 283         | 246         | 112         |
| K676E  | 2A         | patient      | 196442    | 196394       | 48          | 99.98%       | 6733        | 13375       | 7912        | 223767       | 223683       | 84          | 99.96%       | 17468       | 8719        | 3440        |
| K676E  | 2A         | patient      | 297573    | 297495       | 78          | 99.97%       | 10258       | 20814       | 11035       | 259822       | 259754       | 68          | 99.97%       | 15860       | 12430       | 5922        |
| K676E  | 2B         | patient      | 229770    | 229716       | 54          | 99.98%       | 8959        | 14290       | 10577       | 295097       | 295010       | 87          | 99.97%       | 16150       | 13250       | 6930        |
| R986C  | 3P         | parent       | 301981    | 301906       | 75          | 99.98%       | 9763        | 18180       | 12747       | 253061       | 252962       | 99          | 99.96%       | 18331       | 11514       | 5364        |
| R986C  | 3M         | parent       | 428198    | 427929       | 435         | 99.94%       | 9051        | 24124       | 12279       | 329938       | 329817       | 323         | 99.96%       | 13978       | 11398       | 5756        |
| R986C  | 3A         | proband      | 220180    | 220093       | 87          | 99.96%       | 4316        | 13736       | 11547       | 283080       | 282984       | 96          | 99.97%       | 18046       | 13106       | 5660        |
| R986C  | 3A         | proband      | 198829    | 198777       | 52          | 99.97%       | 5031        | 14445       | 7013        | 309204       | 309087       | 117         | 99.96%       | 20654       | 14068       | 5431        |
| R986C  | 3B         | proband      | 253062    | 252831       | 231         | 99.91%       | 4361        | 17015       | 12318       | 229070       | 228893       | 177         | 99.92%       | 15290       | 11159       | 3869        |
| R986C  | 3B         | sibling      | 258289    | 258201       | 88          | 99.97%       | 7394        | 17194       | 8878        | 335071       | 334945       | 126         | 99.96%       | 21666       | 16984       | 6816        |
| R986C  | 3B         | sibling      | 254501    | 254443       | 58          | 99.98%       | 9127        | 16762       | 10941       | 223909       | 223822       | 87          | 99.96%       | 15431       | 11167       | 4346        |
| V1512A | 4A         | patient      | 245222    | 245138       | 84          | 99.97%       | 10099       | 13070       | 8301        | 252168       | 252056       | 112         | 99.96%       | 13210       | 13094       | 3574        |
| V1512A | 4B         | patient      | 316172    | 316096       | 76          | 99.98%       | 8771        | 22421       | 8706        | 176636       | 176569       | 67          | 99.96%       | 10750       | 9814        | 2716        |
| R1281K | 5P         | parent       | 197853    | 197758       | 95          | 99.95%       | 5920        | 13802       | 7852        | 268475       | 268407       | 68          | 99.97%       | 17390       | 13340       | 4899        |
| R1281K | 5M         | parent       | 325851    | 325782       | 69          | 99.98%       | 11187       | 21206       | 13072       | 271348       | 271251       | 97          | 99.96%       | 16479       | 13383       | 6265        |
| R1281K | 5A         | patient      | 82343     | 82319        | 24          | 99.97%       | 3230        | 5570        | 3961        | 392230       | 392111       | 119         | 99.97%       | 24491       | 18898       | 7656        |
| R1281K | 5A         | patient      | 299330    | 299247       | 83          | 99.97%       | 9558        | 18086       | 10887       | 380386       | 380255       | 131         | 99.97%       | 22083       | 17414       | 9195        |
| R1281K | 5A         | patient      | 249439    | 249306       | 133         | 99.95%       | 7137        | 11601       | 9537        | 215038       | 214969       | 69          | 99.97%       | 12149       | 9993        | 4559        |
| R1281K | 5A         | patient      | 278253    | 278193       | 60          | 99.98%       | 9946        | 16136       | 11652       | 267027       | 266942       | 85          | 99.97%       | 17519       | 12905       | 5464        |
| R1281K | 5B         | sibling      | 228536    | 228467       | 69          | 99.97%       | 5410        | 14569       | 10795       | 233407       | 233345       | 62          | 99.97%       | 14843       | 11387       | 5753        |
| R1281K | 5B         | sibling      | 221371    | 221307       | 64          | 99.97%       | 7716        | 14717       | 9803        | 255639       | 255574       | 65          | 99.97%       | 15843       | 12450       | 6473        |
| R1281K | 5C         | sibling      | 289083    | 289021       | 62          | 99.98%       | 10187       | 20497       | 11891       | 209812       | 209741       | 71          | 99.97%       | 13106       | 10477       | 5015        |
| R1281K | 5C         | sibling      | 229406    | 229359       | 47          | 99.98%       | 6236        | 18641       | 7034        | 345490       | 345397       | 93          | 99.97%       | 21762       | 15768       | 5600        |
| R1281K | 5D         | sibling      | 302360    | 302278       | 82          | 99.97%       | 8958        | 22032       | 9463        | 281002       | 280923       | 79          | 99.97%       | 17862       | 13573       | 5923        |
| R1281K | 5D         | sibling      | 251684    | 251608       | 76          | 99.97%       | 6423        | 19681       | 8619        | 236075       | 236004       | 71          | 99.97%       | 15136       | 11479       | 5709        |
| R1281K | 5E         | patient      | 225344    | 225289       | 55          | 99.98%       | 6917        | 17343       | 7567        | 143839       | 143765       | 74          | 99.95%       | 13349       | 4247        | 1398        |
| R1281K | 5F         | sibling      | 64693     | 64674        | 19          | 99.97%       | 1335        | 3688        | 3277        | 13225        | 13215        | 10          | 99.92%       | 545         | 380         | 153         |
| R1281K | 5F         | sibling      | 126919    | 126868       | 51          | 99.96%       | 3595        | 9038        | 4955        | 113207       | 113163       | 44          | 99.96%       | 8395        | 5344        | 1925        |
| R1281K | 5G         | patient      | 91590     | 91565        | 25          | 99.97%       | 3103        | 5627        | 3632        | 188504       | 188441       | 63          | 99.97%       | 13129       | 8893        | 3826        |
| R1281K | 5G         | patient      | 332174    | 332114       | 60          | 99.98%       | 12088       | 21700       | 11810       | 224797       | 224719       | 78          | 99.97%       | 16500       | 10105       | 3562        |
| R1281K | 5H         | patient      | 293092    | 293018       | 74          | 99.97%       | 9151        | 19953       | 10112       | 228812       | 228742       | 70          | 99.97%       | 23304       | 4016        | 1059        |
| R1281K | 5H         | patient      | 73993     | 73929        | 64          | 99.91%       | 2006        | 5988        | 3644        | 66823        | 66764        | 59          | 99.91%       | 4416        | 3759        | 1747        |
| R1281K | 5H         | patient      | 89969     | 89952        | 17          | 99.98%       | 2783        | 7480        | 4181        | 102580       | 102549       | 31          | 99.97%       | 9502        | 1357        | 289         |

|               |                              |                           |
|---------------|------------------------------|---------------------------|
| Group 1       | SAMD9 amp1 F                 | ATGGCAAAGCAACTTAACTCC     |
|               | SAMD9 amp1 R                 | GAAATACCACAAAACTCCC       |
|               | SAMD9 amp3 F                 | TGAAGGTGAAACAGGAAATTGG    |
|               | SAMD9 amp3 R                 | TTAAACAATTTCAATGCATAAGC   |
|               | SAMD9L amp2 F                | CCTCTAGAACCACATTTATG      |
| Group 2       | SAMD9L amp2 R                | GCATTTTGTGGGAATCGTCTAC    |
|               | SAMD9 amp2 F                 | GAGCTTCTGATGTCAGGAAACTG   |
|               | SAMD9 amp2 R                 | CTTCAACTGCTTCATTTCTCTC    |
|               | SAMD9L amp1 F                | ATGAGTAAACAAGTATCTCTACCTG |
|               | SAMD9L amp1 R                | CCACTGAAGAGAGTAATAGA      |
| SAMD9L amp3 F | CAAGGTGTATGGAGATGAAAC        |                           |
| SAMD9L amp3 R | TTAAATTACTTCTATATCATATGCCAGA |                           |

Platinum SuperFi (cat# 12358-010)

|                 |      |             |           |
|-----------------|------|-------------|-----------|
| C1000 machine   | x1   | 98°C x 30"  | 30 cycles |
| 2x SuperFi Mix  | 12.5 | 98°C x 10"  |           |
| 10uM primer mix | 2.5  | 60°C x 10"  |           |
| 25ng DNA        | 10   | 72°C x 1.5' |           |
| Total vol:      | 25   | 72°C x 5'   |           |
|                 |      | 4°C x ∞     |           |

Supplemental Table 9 - SNP coverage

| Family | Individual | Relationship | Gender | Tissue  | Total Reads | Mapped Reads | Unmapped Reads | Mapped Ratio |
|--------|------------|--------------|--------|---------|-------------|--------------|----------------|--------------|
| H880Q  | 1B         | sibling      | male   | spleen  | 5497        | 5487         | 10             | 99.82%       |
| H880Q  | 1B         | sibling      | male   | liver   | 8983        | 8974         | 9              | 99.90%       |
| K676E  | 2P         | parent       | male   | unknown | 8539        | 8530         | 9              | 99.89%       |
| K676E  | 2M         | parent       | female | blood   | 10680       | 10672        | 8              | 99.93%       |
| R986C  | 3P         | parent       | male   | blood   | 20716       | 19380        | 1336           | 93.55%       |
| R986C  | 3P         | parent       | male   | blood   | 13898       | 13176        | 722            | 94.81%       |
| R986C  | 3P         | parent       | male   | blood   | 21928       | 21333        | 595            | 97.29%       |
| R986C  | 3M         | parent       | female | unknown | 8735        | 7533         | 1202           | 86.24%       |
| R986C  | 3M         | parent       | female | unknown | 15452       | 14854        | 598            | 96.13%       |
| R986C  | 3M         | parent       | female | blood   | 20320       | 19380        | 940            | 95.37%       |
| R1281K | 5P         | parent       | male   | buccal  | 12204       | 11966        | 238            | 98.05%       |
| R1281K | 5M         | parent       | female | buccal  | 16318       | 16005        | 313            | 98.08%       |
| R1281K | 5D         | sibling      | female | buccal  | 13300       | 13048        | 252            | 98.11%       |

| Chrom | Pos      | Ref.Allele | Alt.Allele | Impacted.Gene | AA     | name            | seq                                                   | name            | seq                                                    | size |
|-------|----------|------------|------------|---------------|--------|-----------------|-------------------------------------------------------|-----------------|--------------------------------------------------------|------|
| 7     | 92762645 | G          | T          | SAMD9L        | H880Q  | tagged H880Q F  | TCGTCGGCAGCGTCAGATGTGTATAAGAGACAGGGAATCCAGATGAAAGTGC  | tagged H880Q R  | GTCTCGTGGGCTCGGAGATGTGTATAAGAGACAGGAGTCAGTAACATAAGAGC  | 277  |
| 7     | 92763579 | T          | G          | SAMD9L        | Q569P  | tagged Q569P F  | TCGTCGGCAGCGTCAGATGTGTATAAGAGACAGGGCAGAGAGAAAGAGCTTC  | tagged Q569P R  | GTCTCGTGGGCTCGGAGATGTGTATAAGAGACAGCTGTGGTTTGTAGTTTCATC | 274  |
| 7     | 92733385 | T          | C          | SAMD9         | K676E  | tagged K676E F  | TCGTCGGCAGCGTCAGATGTGTATAAGAGACAGGGCTTTTGCCATCTATTGG  | tagged K676E R  | GTCTCGTGGGCTCGGAGATGTGTATAAGAGACAGGGTACTTGTGGTTAGAAAG  | 302  |
| 7     | 92761443 | C          | T          | SAMD9L        | R1281K | tagged R1281K F | TCGTCGGCAGCGTCAGATGTGTATAAGAGACAGCTGATCCCAGAAATGAATGT | tagged R1281K R | GTCTCGTGGGCTCGGAGATGTGTATAAGAGACAGCTAGCTTTTCTGCAATTC   | 279  |
| 7     | 92732005 | C          | G          | SAMD9         | E1136Q | tagged E1136Q F | TCGTCGGCAGCGTCAGATGTGTATAAGAGACAGGTTCAACCCAAATGCATTC  | tagged E1136Q R | GTCTCGTGGGCTCGGAGATGTGTATAAGAGACAGGCCTTTTGTACTTCGGATAC | 332  |
| 7     | 92762329 | G          | A          | SAMD9L        | R986C  | tagged R986C F  | TCGTCGGCAGCGTCAGATGTGTATAAGAGACAGCATATACACTAGTACACCC  | tagged R986C R  | GTCTCGTGGGCTCGGAGATGTGTATAAGAGACAGCCTTTCGCTGTCTTGAAG   | 293  |

| C1000 machine   |  | x1   |                                                                             |
|-----------------|--|------|-----------------------------------------------------------------------------|
| 2x SuperFi Mix  |  | 12.5 | 98°C x 30"<br>98°C x 10"<br>60°Cx 10"<br>72°C x 30"<br>72°C x 5"<br>4°C x ∞ |
| 10uM primer mix |  | 2.5  |                                                                             |
| H2O             |  | 6    |                                                                             |
| 25ng DNA        |  | 4    |                                                                             |
| Total vol:      |  | 25   |                                                                             |

Supplemental Table 10 - mutagenesis primers

| Name                   | Sequence                            |
|------------------------|-------------------------------------|
| <b>SAMD9 K676E F</b>   | AAATTCCTTGAATTCGAGGCATCAAAGAGG      |
| <b>SAMD9 K676E R</b>   | CCTCTTTTGATGCCTCGAATTCAAGGAATTT     |
| <b>SAMD9L R843W F</b>  | AACTGCATGAGATCCTGGAATCCAGATGAAA     |
| <b>SAMD9L R843W R</b>  | TTTCATCTGGATTCCAGGATCTCATGCAGTT     |
| <b>SAMD9L R986C F</b>  | AGATACACAGGTGTGTGTATCATTACCCTC      |
| <b>SAMD9L R986C R</b>  | GAGGGTGAATGATACACACACCTGTGTATCT     |
| <b>SAMD9L V1512A F</b> | GGCACAGTGGGGATGCGTGGAAAAAATGA       |
| <b>SAMD9L V1512A R</b> | TCATTTTTTTCCACGCATCCCCACTGTGCC      |
| <b>SAMD9L V19E F</b>   | CCAAAGAGCATGAGAAAAAATGGGT           |
| <b>SAMD9L V19E R</b>   | ACCCATTTTTTCTCATGCTCTTTGG           |
| <b>SAMD9L R223* F</b>  | AGCAATGAAGTCTTCTGATTTGCATCAGCTT     |
| <b>SAMD9L R223* R</b>  | AAGCTGATGCAAATCAGAAGACTTCATTGCT     |
| <b>SAMD9L H880Q F</b>  | GAAATTGAAAAGCAGCAAAGAAGTGTGAAAACCTT |
| <b>SAMD9L H880Q R</b>  | AAGTTTTCACAGTTCTTTTGCTGCTTTTCAATTC  |
| <b>SAMD9L R1281K F</b> | GTTCTTCTGAAAATGAAGTATACCCAAAAAGAA   |
| <b>SAMD9L R1281K R</b> | TTCTTTTTGGGTATACTTCATTTTCAGAAGAAC   |
| <b>SAMD9L Q569P F</b>  | TCTGGGCTTTCTATCCAGCTCTCAAAGGAAT     |
| <b>SAMD9L Q569P R</b>  | ATTCCTTTGAGAGCTGGATAGAAAGCCCAGA     |



Supplemental Table 11 - samples

| Representative samples |            |              |        |                    |
|------------------------|------------|--------------|--------|--------------------|
| Family                 | Individual | Relationship | Gender | Source             |
| H880Q                  | 1P         | parent       | male   | PB                 |
| H880Q                  | 1M         | parent       | female | PB                 |
| H880Q                  | 1A         | proband      | female | BM                 |
| H880Q                  | 1B         | sibling      | male   | BM                 |
| K676E                  | 2P         | parent       | male   | PB                 |
| K676E                  | 2M         | parent       | female | PB                 |
| K676E                  | 2A         | proband      | male   | BM                 |
| K676E                  | 2B         | sibling      | male   | BM                 |
| R986C                  | 3P         | parent       | male   | PB                 |
| R986C                  | 3M         | parent       | female | PB                 |
| R986C                  | 3A         | proband      | female | BM                 |
| R986C                  | 3B         | sibling      | female | BM                 |
| V1512A                 | 4A         | proband      | female | BM                 |
| V1512A                 | 4B         | sibling      | female | BM                 |
| R1281K                 | 5P         | parent       | male   | PB                 |
| R1281K                 | 5M         | parent       | female | PB                 |
| R1281K                 | 5A         | proband      | male   | BM - 5 years old   |
| R1281K                 | 5A         | proband      | male   | PB- 15 years old   |
| R1281K                 | 5A         | proband      | male   | PB- 18 years old   |
| R1281K                 | 5B         | sibling      | female | BM                 |
| R1281K                 | 5C         | sibling      | male   | BM                 |
| R1281K                 | 5D         | sibling      | female | BM                 |
| R1281K                 | 5E         | sibling      | female | BM                 |
| R1281K                 | 5F         | sibling      | female | BM                 |
| R1281K                 | 5G         | sibling      | male   | BM - 2.5 years old |
| R1281K                 | 5G         | sibling      | male   | PB - 6 years old   |
| R1281K                 | 5H         | sibling      | female | PB                 |
